1           **Targeting ischemia-induced KCC2 hypofunction rescues refractory neonatal**  
2           **seizures and mitigates epileptogenesis in a mouse model**

3  
4  
5           **Brennan J. Sullivan<sup>1</sup>, Pavel A. Kipnis<sup>1</sup>, Brandon M. Carter<sup>1</sup>, Shilpa D. Kadam<sup>1, 2\*</sup>**

6  
7           <sup>1</sup>Neuroscience Laboratory, Hugo Moser Research Institute at Kennedy Krieger,  
8           Baltimore, MD, USA.

9           <sup>2</sup>Department of Neurology, Johns Hopkins University School of Medicine, Baltimore, MD  
10           21205, USA.

11  
12  
13  
14  
15  
16           Running title: KCC2 hypofunction in neonatal ischemic seizures

17           Number of words: 10606

18           Number of pages: 60

19           Number of Figures: 8

20           Number of Supplemental Figures: 4

21           Resources Table: 1

22           Keywords: hypoxic-ischemic encephalopathy, refractory, neonatal seizures, KCC2  
23           hypofunction, epilepsy

24  
25  
26  
27           Abbreviations: Phenobarbital (PB), Antiseizure medication (ASM),  
28           Electroencephalography (EEG), K-Cl co-transporter 2 (KCC2), Na-K-Cl cotransporter 1  
29           (NKCC1), GABA receptor (GABAR) hypoxic-ischemic encephalopathy (HIE)  
30           Tropomyosin receptor kinase B (TrkB)

31  
32  
33  
34  
35  
36           **Corresponding Author:**

37           Shilpa D. Kadam, PhD

38           Neuroscience Laboratory, Hugo Moser Research Institute at Kennedy Krieger;

39           Department of Neurology, Johns Hopkins University School of Medicine,

40           707 North Broadway, 400H;

41           Baltimore, MD 21205

42           Phone: 443-923-2688,

43           Fax: 443-923-2695,

44           E-mail: [kadam@kennedykrieger.org](mailto:kadam@kennedykrieger.org)

45

46 **Abstract**

47 Neonatal seizures pose a clinical challenge for their early detection, acute  
48 management, and mitigation of long-term comorbidities. A major cause of neonatal  
49 seizures is hypoxic-ischemic encephalopathy that results in seizures that are frequently  
50 refractory to the first-line anti-seizure medication phenobarbital (PB). One proposed  
51 mechanism for PB-inefficacy during neonatal seizures is the reduced expression and  
52 function of the neuron-specific  $K^+/Cl^-$  cotransporter 2 (KCC2), the main neuronal  $Cl^-$   
53 extruder that maintains chloride homeostasis and influences the efficacy of GABAergic  
54 inhibition. To determine if PB-refractoriness after ischemic neonatal seizures is  
55 dependent upon KCC2 hypofunction and can be rescued by KCC2 functional  
56 enhancement, we investigated the recently developed KCC2 functional enhancer  
57 CLP290 in a CD-1 mouse model of refractory ischemic neonatal seizures quantified with  
58 vEEG. We report that acute CLP290 intervention can rescue PB-resistance, KCC2  
59 expression, and the development of epileptogenesis after ischemic neonatal seizures.  
60 KCC2 phosphorylation sites have a strong influence over KCC2 activity and seizure  
61 susceptibility in adult experimental epilepsy models. Therefore, we investigated seizure  
62 susceptibility in two different knock-in mice in which either phosphorylation of S940 or  
63 T906/T1007 was prevented. We report that KCC2 phosphorylation regulates both  
64 neonatal seizure susceptibility and CLP290-mediated KCC2 functional enhancement.  
65 Our results validate KCC2 as a clinically relevant target for refractory neonatal seizures  
66 and provide insights for future KCC2 drug development.

67

68

## 69 **Introduction**

70 Neonatal seizures occur in an estimated 1 to 3.5 per 1000 live births in the term  
71 infant. Hypoxic-ischemic encephalopathy (HIE) is a major cause of acute neonatal  
72 seizures (1). The management of these seizures are a major clinical challenge as they  
73 are often refractory to an initial loading dose of the first-line anti-seizure medication (ASM)  
74 phenobarbital (PB) and adjunct ASMs (2, 3). Compared to seizures at older ages,  
75 neonatal seizures differ in their etiology, semiology, electrographic signature, and  
76 response to ASMs (1, 4). There is an urgent need to identify the developmental  
77 mechanisms underlying seizure susceptibility and ineffective ASM response in the  
78 neonatal brain.

79 The neonatal brain has lower expression of its chief chloride extruder the neuron-  
80 specific  $K^+-Cl^-$  cotransporter 2 (KCC2), and a high neuronal intracellular chloride  
81 concentration ( $[Cl^-]_i$ ) (5–7). GABA is the primary inhibitory neurotransmitter in the mature  
82 brain, however in the neonatal brain the activation of GABA<sub>A</sub> receptors (GABA<sub>A</sub>R) results  
83 in depolarizing actions on immature neurons (8). KCC2 expression and function increase  
84 during development, resulting in a lower  $[Cl^-]_i$  that coincides with a developmental shift  
85 from depolarizing to hyperpolarizing GABAergic signaling. The importance of KCC2  
86 function in seizure susceptibility is supported by emerging evidence from human genetics,  
87 as pathogenic variants in *SLC12A5* are associated with the development of idiopathic  
88 generalized epilepsy and early infantile epileptic encephalopathy (OMIM #616685 and  
89 #616645, respectively) (9).

90 Despite the introduction of many new ASMs into clinical practice over the past 20  
91 years, the incidence of refractory seizures has remained unchanged (10). KCC2

92 hypofunction is increasingly associated with pharmaco-resistant epilepsies and is a  
93 proposed cause of disinhibition (11, 12). GABA<sub>A</sub>R mediated fast synaptic inhibition and  
94 the anti-seizure efficacy of PB (a positive allosteric modulator of GABA<sub>A</sub>Rs) are both  
95 dependent upon active neuronal Cl<sup>-</sup> extrusion (13, 14). In a preclinical CD-1 mouse model  
96 of ischemic neonatal seizures, KCC2 is transiently downregulated and associated with  
97 PB-resistant seizures (15). In this model, post-ischemic tropomyosin receptor kinase  
98 (TrkB) inhibition rescued PB-resistant neonatal seizures and KCC2 expression (16, 17).  
99 This acute rescue of KCC2 hypofunction via TrkB inhibition improved long-term outcomes  
100 after ischemic neonatal seizures (18, 19). These results suggest KCC2 as a novel  
101 therapeutic target for refractory neonatal seizures.

102 A recent high throughput screen for compounds that reduce [Cl<sup>-</sup>]<sub>i</sub> in a cell line with low  
103 KCC2 expression identified the compound CLP257 as a KCC2 functional enhancer (20).  
104 To improve the poor pharmacokinetics of CLP257, the carbamate prodrug CLP290 was  
105 designed and improved the half-life ( $t_{1/2}$ ) from <15min to 5h (20). These compounds  
106 provide an opportunity to test whether KCC2 functional enhancement can rescue the  
107 emergence of PB-resistant neonatal seizures after ischemia in our preclinical CD-1  
108 mouse model. KCC2 expression increases twofold in mouse pups during development  
109 between P7 and P10 (15). Therefore to examine the developmental differences in  
110 ischemic seizure suppression after KCC2 functional enhancement both age groups were  
111 included. Neonatal seizures are associated with poor long-term outcomes including the  
112 development of epilepsy (21, 22). Therefore, the effect of acute CLP290 intervention at  
113 P7 was evaluated at P12 using a new subthreshold pentylenetetrazol (PTZ) dosing  
114 protocol to investigate epileptogenesis. To test if KCC2 hypofunction could induce ictal

115 events independent of ischemia, the selective KCC2 inhibitor VU0463271 was  
116 administered to P7 naïve pups during vEEG. KCC2 posttranslational modifications are  
117 tightly regulated throughout development and strongly influence KCC2 activity (23–25).  
118 The KCC2 phosphorylation sites S940 (25) and T1007 (24) were investigated for their  
119 role in CLP290-mediated effects on neonatal refractory seizures. Using two knock-in  
120 mutant mice that prevent either S940 (25) or T1007 (24) phosphorylation, we investigated  
121 the importance of these sites on neonatal seizure susceptibility and post-ischemic PB-  
122 efficacy.

## 123 **Results**

### 124 *CLP290 rescues phenobarbital-resistant seizures at P7*

125         The true burden of acute ischemic seizures in mouse pups cannot be identified by  
126 behavioral scoring parameters alone and require continuous vEEG recordings as their  
127 presentation can range from entirely electrographic to generalized convulsive (7). In our  
128 CD-1 neonatal mouse model of unilateral carotid ligation, pups presented with PB-  
129 resistant ischemic neonatal seizures at P7 (Fig. 1A-D), an established characteristic of  
130 the model (15–17, 26). All pups underwent 1h of baseline vEEG recording after unilateral  
131 carotid ligation. After 1h of vEEG recording all pups received a loading dose of PB with a  
132 subsequent hour of vEEG recording (Fig. 1A-D). Pups that only received a PB loading  
133 dose (PB-only) were pharmacoresistant, as their 2<sup>nd</sup>h seizure burden remained high and  
134 was similar to 1<sup>st</sup>h levels (Fig 1C-F).

135         To investigate if the KCC2 functional enhancer CLP290 could rescue PB-resistant  
136 seizures, CLP290 was administered intraperitoneally at P7 in the Pre, Post, or Primed  
137 groups (Fig. 1 B). Administration of Primed CLP290 10mg/kg (10') significantly reduced

138 total seizure burden, duration, and frequency of 2<sup>nd</sup>h seizure events (Fig. 1C-E). This  
139 decrease in 2<sup>nd</sup>h seizure burden significantly increased seizure suppression after PB  
140 administration, thereby rescuing P7 PB-resistance (Fig. 1D-F). In contrast to 10', bolus  
141 administration of 20mg/kg CLP290 reduced 1<sup>st</sup>h baseline seizure burden (Supplemental  
142 Fig. 1).

143

#### 144 *Pro-drug CLP290 improved brain availability*

145 A major limiting factor for epilepsy drug development is the *in vivo* brain availability  
146 of candidate compounds identified *in vitro* (27, 28). CLP290 is a carbamate prodrug of  
147 CLP257 and has an improved  $t_{1/2}$  from <15min (CLP257) to 5h (CLP290) in blood samples  
148 from adult rats (20). The brain availability of CLP257 and CLP290 have not been  
149 previously published. At P7, CLP257 was unable to reduce 2<sup>nd</sup>h seizure burden (Fig. 1  
150 G-J) when administered systemically at the 10' dose. To determine if CLP290 efficacy  
151 and CLP257 inefficacy were due to differences in pharmacokinetics, we performed HPLC  
152 to analyze brain levels of CLP257 after I.P. delivery of either CLP257 or CLP290 (Fig. 1K  
153 and Supplemental Fig. 2). At P7 and P10, CLP290 administration of 10 or 20mg/kg  
154 demonstrated adequate brain availability. (Fig. 1L). CLP257 had poor brain availability  
155 compared to CLP290 (Fig. 1K-M), which suggested that the inability of CLP257 to rescue  
156 PB-refractory seizures was due to its poor pharmacokinetic profile.

157

#### 158 *CLP290 efficacy on phenobarbital-responsive seizures at P10*

159 As previously reported (15–17, 26), ischemic neonatal seizures after unilateral  
160 carotid ligation in P10 CD-1 pups were PB-responsive (Fig. 2 A-E). The age-dependent

161 emergence of PB-resistant and PB-responsive seizures at P7 versus P10 is a  
162 characteristic of the neonatal mouse model that is associated with a twofold increase in  
163 KCC2 expression between P7 and P10 (15). Administration of CLP290 at P10 did not  
164 further improve the efficacy of PB at any of the doses tested (Fig. 2 C-E). When ischemic  
165 neonatal seizures were PB-responsive at P10, the previously reported TrkB-antagonist  
166 ANA12 (17, 26) also did not improve the efficacy of PB. This suggests that the therapeutic  
167 benefit of KCC2 functional enhancement is dependent upon the degree of KCC2  
168 hypofunction which is evident in the emergence of refractoriness at P7 but not at P10.

169

#### 170 *CLP290 rescued ipsilateral post-ischemic KCC2 and S940 downregulation*

171 PB-resistant ischemic neonatal seizures have been shown to significantly reduce  
172 expression of KCC2 and phosphorylation of S940 24h after ischemia (17). P7 unilateral  
173 carotid ligation did not result in an infarct stroke injury, therefore KCC2 degradation at  
174 24h is not caused by infarct related cell-death (15). In this model, KCC2 expression  
175 undergoes a recovery over 3-4 days, a characteristic that is associated with the transient  
176 nature of neonatal seizures due to HIE (29, 30). At 24h after P7 unilateral carotid ligation,  
177 KCC2 and S940 expression was significantly lower in the right hemisphere (ipsilateral to  
178 ischemia) than the left hemisphere (contralateral to ischemia) in the PB-only group (Fig.  
179 3 A-E). Intervention with CLP290 at P7 rescued both KCC2 and S940 downregulation in  
180 the 10' group 24h after ligation (Fig. 3 D-E). Bolus administration of CLP290 20mg/kg  
181 Post significantly increased S940 expression bilaterally compared to the PB-only group  
182 at P7 (Fig. 3C and Supplemental Fig. 3 A-B). When ischemic neonatal seizures are PB-  
183 responsive at P10, KCC2 expression was not significantly decreased at 24h (Fig. 3 F-I).

184 However, the ratio of ipsilateral to contralateral S940 expression in the PB-only group  
185 was significantly decreased (Fig. 3 H-J) and was rescued in all CLP290 treatment groups  
186 (Fig. 3 H-J). Therefore, when ischemic neonatal seizures were PB-resistant, CLP290  
187 rescued KCC2 expression and S940 phosphorylation, suggesting that the degree of  
188 KCC2 hypofunction drives the therapeutic benefit of KCC2 functional enhancement.

189

190 *CLP290 rescue of PB-resistant seizures was not mediated through BDNF-TrkB*

191 Ischemic neonatal seizures at P7 induce a significant bilateral increase in TrkB  
192 expression and phosphorylation of Y816 (17, 26). Similarly, TrkB expression and Y816  
193 phosphorylation were significantly upregulated bilaterally in the PB-only group 24h after  
194 ischemic neonatal seizures at P7 (Fig. 3K-O) but not at P10 (Fig. 3 P-T and Supplemental  
195 Fig. 3 C-D). In this study, the bilateral increase in post-ischemic TrkB and Y816  
196 expression was detected as previously characterized (17). Increased TrkB expression  
197 was not significantly rescued by CLP290 however Y816 was (Fig. 3 K-O). 24h after P7,  
198 the Y816/TrkB ratios demonstrated a significant bilateral reduction in the ratio by CLP290  
199 20 post (Supplemental Fig. 3C), driven by the significant increase in TrkB expression (Fig.  
200 3L-O). In this model, ischemic neonatal seizures at P10 were PB-responsive and P10  
201 pups did not show activation of TrkB (Fig. 3P-T and Supplemental Fig. 3 C-D). These  
202 results suggest that the CLP290-mediated seizure suppression in the 10' group at P7 was  
203 independent of TrkB.

204

205 *Acute CLP290 intervention at P7 mitigates epileptogenesis at P12*



206 HIE seizures are transient within the first week of life (29, 30) and the long-term  
207 consequences of neonatal seizures are difficult to isolate from the consequences of  
208 prolonged and/or inefficacious anti-seizure therapy in the clinic (22). In our CD-1 mouse  
209 model of refractory neonatal ischemic seizures, we have previously documented the  
210 emergence of epilepsy in adulthood (31). To assess if the acute rescue of PB-resistant  
211 neonatal seizures at P7 via CLP290 had long-term benefits, the same pups underwent a  
212 PTZ challenge at P12 (Fig. 4A-B). Previously, a 80mg/kg dose of PTZ was shown to  
213 induce high seizure burdens that were PB-responsive and upregulated KCC2 at P7 in  
214 CD-1 pups (32). In this study, pups were administered three doses of PTZ (20, 20, and  
215 40 mg/kg) 1h apart (Fig. 4A-B). Using this protocol, we characterized seizure  
216 susceptibility in P7 naïve, P7 PB-only, and P7 CLP290 10' treated pups at P12. The initial  
217 dose of PTZ induced seizures in the 1<sup>st</sup>h for all groups (Fig. 4A-D). Naïve pups  
218 demonstrated a general reduction in seizures during the second and third PTZ doses,  
219 potentially uncovering a homeostatic compensation to help develop resistance to the  
220 chemoconvulsant induced seizures. PB-only pups demonstrated an increase in seizure  
221 burden after the repeated doses of PTZ, with mice (n=3) going into status epilepticus.  
222 Thus, the significant increase in PB-only seizure burdens at P12 was driven by a  
223 significant increase in seizure duration (Fig. 4E). CLP290 10' treated pups had similar  
224 P12 seizure burdens as naïve pups and significantly lower than PB-only pups (Fig. 4A-  
225 D). This novel PTZ challenge protocol identified epileptogenesis in the form of heightened  
226 susceptibility to seizures at P12 for neonatal pups that underwent standard but  
227 inefficacious PB treatment for their refractory seizures, efficacious CLP290 10'  
228 intervention at P7 resulted in the regression of epileptogenesis at P12.

229 *In vivo KCC2 inhibition is epileptogenic in the neonatal brain*

230         The selective KCC2 inhibitor VU0463271 (VU) has been shown to induce  
231 epileptiform discharges in the dorsal hippocampus of the adult mouse, highlighting the  
232 critical role of KCC2 in the mature hippocampus (33). Here, naive P7 CD-1 pups were  
233 administered 0.25mg/kg VU (I.P.) at the initiation of vEEG recording with a subsequent  
234 dose of 0.5mg/kg VU (I.P.) at 1h (Fig. 5A-B). Selective inhibition of KCC2 was sufficient  
235 to induce epileptiform activity (Fig. 5A-E) at P7. Prolonged and repeated seizures are  
236 known to play a role in the reduction of neuronal surface KCC2 expression and function  
237 (15, 34–36). At P7, if post-ischemic KCC2 hypofunction plays a critical role in PB-  
238 refractoriness, KCC2 inhibition following repeated ischemic seizures would be expected  
239 to further aggravate the seizure burden. To test the effect of KCC2 inhibition following  
240 repeated ischemia-induced neonatal seizures at P7, VU 0.25 mg/kg (I.P.) was  
241 administered 1h after unilateral carotid ligation (Fig. 5F). P7 pups that received VU after  
242 1h of ischemic seizures developed a significant aggravation of EEG seizure burden in the  
243 second hour (Fig. 5F-J). Taken together, KCC2 inhibition induced epileptiform activity in  
244 the naïve neonatal brain and exacerbated ischemic neonatal seizures at P7.

245

246 *In vitro CLP257 incubation increases KCC2 membrane insertion*

247         The KCC2 functional enhancer CLP257 has been shown to increase chloride  
248 extrusion capacity and KCC2 membrane expression *in vitro*, and it has been suggested  
249 that the net effect of KCC2 functional enhancement may emerge from relatively small  
250 changes in KCC2 function (11, 20, 37). The neonatal brain tightly regulates KCC2 activity  
251 via S940 and T1007 phosphorylation (23), and it is unknown if age-dependent

252 mechanisms affect KCC2 functional enhancement. Therefore, P7 neonatal brain sections  
253 were incubated with graded doses of CLP257 or CLP290 (Fig. 6A-C). 500 $\mu$ M CLP257  
254 significantly increased membrane KCC2 and S940 expression (Fig. 6B). The  
255 phosphorylation of S940 increases KCC2 plasma membrane accumulation and transport  
256 activity (38, 39). To assess if the S940 site was necessary for CLP257 mediated KCC2  
257 membrane insertion, brain sections from S940A<sup>+/+</sup> knock-in mutant mice (25) were treated  
258 with CLP257 (Fig. 6 D-G). Without the ability to phosphorylate S940, CLP257 failed to  
259 increase KCC2 membrane insertion (Fig. 6 F).

260

#### 261 *Ischemic neonatal seizures do not modulate KCC2-T1007 phosphorylation*

262 The phosphorylation of KCC2 residue T1007 inhibits KCC2 function (40, 41). It has  
263 been proposed that KCC2 functional enhancers must either increase KCC2 surface  
264 stability and/or decrease T1007 phosphorylation (42, 43). Therefore, T1007  
265 phosphorylation was investigated 24h after P7 ischemic neonatal seizures (Fig. 7A-C).  
266 Ischemia did not significantly change T1007 expression at 24h in either hemisphere (Fig.  
267 7A-C and Supplemental Fig. 4). The effective CLP290 10' dose also did not significantly  
268 modulate T1007 expression, however bolus administration of 20 mg/kg CLP290 resulted  
269 in a significant increase in T1007 at 24h in both pre and post treatment groups (Fig. 7A-  
270 D). To investigate if pharmacomodulation of KCC2 is governed by T1007, naïve CD-1 P7  
271 brain sections were treated with CLP257 (Fig. 7E-H). All groups treated with CLP257  
272 showed lower T1007 expression at the membrane than untreated slices (Fig. 7G)  
273 supporting the data from the *in vivo* experiments (Fig. 7B &C).

274

275 *Spontaneous epileptiform discharges in S940A<sup>+/+</sup> pups*

276 KCC2 deficient mice die postnatally with generalized seizures and respiratory failure  
277 (44, 45). S940A<sup>+/+</sup> mice are susceptible to death after kainate induced status epilepticus  
278 in adulthood (36). In patients with idiopathic generalized epilepsy and early childhood  
279 onset of febrile seizures, heterozygous missense variants in *SLC12A5* have been  
280 identified (46, 47) and associated with a reduction in S940 phosphorylation (46).  
281 However, it is unknown if the prevention of S940 phosphorylation alone can induce  
282 spontaneous epileptiform activity during the neonatal period. Therefore, S940A<sup>+/+</sup> pups  
283 underwent vEEG at P7 and P12 (Fig. 8A-D). S940A<sup>+/+</sup> mice had spontaneous epileptiform  
284 discharges at both P7 and P12, which failed to respond to CLP290 intervention (Fig.  
285 8AD). These results suggest that the prevention of S940 phosphorylation is sufficient for  
286 spontaneous epileptic activity during development.

287

288 *T1007A<sup>+/+</sup> pups are resistant to ischemic seizures*

289 T1007 phosphorylation decreases during development and is associated with an  
290 increase in neuronal Cl<sup>-</sup> extrusion capacity (23, 48, 49). T1007A<sup>+/+</sup> knock-in mutant mice  
291 have a reduced susceptibility to kainate induced status epilepticus in adulthood (24). It is  
292 unknown if KCC2 phosphorylation alone can modulate the susceptibility to ischemic  
293 neonatal seizures. To investigate the role of KCC2 phosphorylation in ischemic neonatal  
294 seizures WT, S940A<sup>+/+</sup>, and T1007A<sup>+/+</sup> P7 pups underwent unilateral carotid ligation with  
295 2h vEEG recordings (Fig. 8E-G). After P7 unilateral carotid ligation T1007A<sup>+/+</sup> pups were  
296 significantly resistant to ischemic seizures than WT (Fig. 8E-G). This result suggests that  
297 reducing T1007 phosphorylation on KCC2 is a promising therapeutic target to be

298 developed for neonatal seizures. S940A<sup>+/+</sup> pups had higher seizure burdens than WT after  
299 ischemia (Fig. 8G). CLP290 10' treatment did not improve the efficacy of PB in S940A<sup>+/+</sup>  
300 mice but significantly increased 1<sup>st</sup> hour seizure burden when compared to untreated  
301 S940A<sup>+/+</sup> mice (Fig. 8H). During development, mice undergo a reduction in ischemic  
302 seizure susceptibility from P7 to P10 that is associated with a robust upregulation of KCC2  
303 and S940 phosphorylation (15, 26). S940A<sup>+/+</sup> mice did not undergo a developmental  
304 decrease in ischemic seizure susceptibility at P10 when compared to P7 S940A<sup>+/+</sup> mice  
305 (Fig. 8I; P=0.57). These results suggest that both the CLP290-mediated KCC2 functional  
306 enhancement and the age-dependent reduction in ischemic seizure susceptibility are  
307 dependent upon S940 phosphorylation.

308

### 309 *S940A<sup>+/+</sup> pups are susceptible to status epilepticus and death*

310 To determine if the ability for KCC2 phosphorylation to modulate seizure  
311 susceptibility was specific to ischemic seizures, WT, S940A<sup>+/+</sup>, and T1007A<sup>+/+</sup> P12 pups  
312 underwent the 3h PTZ challenge (Fig. 8J-O). As described previously (Fig. 4), pups were  
313 administered three doses of PTZ (20, 20, and 40 mg/kg) 1h apart. S940A<sup>+/+</sup> mice  
314 immediately progressed into status epilepticus and died before the 2<sup>nd</sup>h (Fig. 8 J-O). This  
315 indicated that the prevention of S940 phosphorylation increased the risk of sudden  
316 unexpected death in epilepsy (SUDEP)-like phenomenon (50). In contrast, T1007A<sup>+/+</sup>  
317 mice were resistant to the PTZ induced seizures when compared to WT (Fig. 8 M).  
318 Additionally, the assessment of righting reflex as a neurodevelopmental milestone  
319 identified that only S940A<sup>+/+</sup> mice had a significantly impaired righting reflex at P7 but not

320 at P12 (Fig. 8P). These data suggest that KCC2 phosphorylation controls seizure  
321 susceptibility during development.

322

## 323 **Materials and Methods**

### 324 **Experimental Paradigm**

325 In CLP290 and CLP257 experiments, all pups regardless of treatment group  
326 received a loading dose of PB (25mg/kg) dissolved in 100% isotonic phosphate-buffered  
327 saline (PBS) delivered via intraperitoneal (IP) injection at 1h. All injections regardless of  
328 the treatment group, drug, or age were administered using Hamilton syringes. All drugs  
329 were prepared the day of experiments. CLP290 and CLP257 were both dissolved in  
330 45/55% 2-Hydroxypropyl- $\beta$ -cyclodextrin (HPCD)/PBS with a pH range between 7.2-7.5.

331 To assess the efficacy of CLP290 treatment at P7, pups were assigned to the PB-  
332 only, post, primed, or pre-treatment groups (Fig. 1). PB-only treatment was defined by the  
333 single administration of PB at 1h without further intervention. Post treatment was denoted  
334 by administration of CLP290 immediately following unilateral carotid ligation with PB at  
335 1h. 5, 10, or 20mg/kg CLP290 was administered via IP injections to P7 pups in the post  
336 treatment groups (i.e. P7 CLP290 Post 5, 10, and 20). The primed treatment group was  
337 defined by the administration of CLP290 4h preceding unilateral carotid ligation and  
338 another dose immediately following unilateral carotid ligation with PB at 1h. The  
339 pretreatment group was denoted by the single administration of CLP290 4h before  
340 unilateral carotid ligation with PB at 1h after ligation (i.e. P7 CLP290 Pre 20”).

341 As a carbamate prodrug of CLP257, CLP290 has an improved bioavailability in  
342 P7 CD-1 pups when compared to CLP257. To investigate the differential effects of

343 CLP290 and CLP257 on neonatal seizure suppression, P7 pups were administered  
344 10mg/kg CLP257 in a primed-treatment group with PB at 1h after ligation. At P10, when  
345 seizures after unilateral carotid ligation are responsive to PB, the efficacy of 10mg/kg  
346 CLP290 to improve seizure suppression was investigated. P10 pups were either assigned  
347 to the post, primed, or pretreatment groups with PB 1h after ligation.

348

### 349 **Animals**

350 All experimental procedures and protocols were conducted in compliance with  
351 guidelines by the Committee on the Ethics of Animal Experiments (Permit Number:  
352 A3272-01) and were approved by the Animal Care and Use of Committee of Johns  
353 Hopkins University. CD1 litters were purchased from Charles River Laboratories  
354 (Wilmington, MA.). Newly born CD-1 litters (n=10) were delivered with a dam at postnatal  
355 day three or four and allowed to acclimate. S940A<sup>+/+</sup> and T906A/T1007A<sup>+/+</sup> mice were a  
356 gift from Stephen J. Moss Laboratories at the Tufts University School of Medicine.  
357 Equivalent numbers of male and female pups were introduced into the study. All mice  
358 were housed on a 12h light-dark cycle with food and water provided *ad libitum*. For  
359 surgical procedures and western blotting see Supplement.

360

### 361 ***In vivo* video-EEG recording and analyses**

362 EEG recordings were acquired using Sirenia Acquisition software with  
363 synchronous video capture (Pinnacle Technology Inc. KS, USA). Data acquisition was  
364 done with sampling rates of 400Hz that had a preamplifier gain of 100 and the filters of  
365 0.5Hz high-pass and 50Hz low-pass. The data were scored by binning EEG in 10s

366 epochs. Similar to our previous studies(15), seizures were defined as electrographic ictal  
367 events that consisted of rhythmic spikes of high amplitude, diffuse peak frequency of  $\geq 7$ -  
368 8Hz (i.e.; peak frequency detected by automated spectral power analysis) lasting  $\geq 6$ s  
369 (i.e.; longer than half of each 10s epoch). Short duration burst activity lasting  $< 6$ s (brief  
370 runs of epileptiform discharges) was not included for seizure burden calculations similar  
371 to previous studies in the model. Mean time spent seizing for 1<sup>st</sup>h baseline seizure burden  
372 vs. 2<sup>nd</sup>h post-PB seizure burden was quantified in seconds. Mean seizure suppression  
373 was calculated using Equation 1:

$$374 \quad \% \text{ seizure suppression} = \frac{(1^{\text{st}} \text{h seizure burden} - 2^{\text{nd}} \text{h seizure burden})}{(1^{\text{st}} \text{h seizure burden})} * 100$$

375 Mean ictal events and ictal durations (seconds/event) were calculated for 1<sup>st</sup>h vs.  
376 2<sup>nd</sup>h.

377

## 378 **Statistics**

379 For all experiments, the quantification and analysis of data were performed blinded  
380 to the genotype, sex, and treatment conditions. All statistical tests were performed using  
381 GraphPad Prism software. Two-way analysis of variance (ANOVA) was performed with  
382 Tukey's post hoc correction. One-way ANOVA was performed with Dunnett's post hoc  
383 correction. Paired and unpaired t-tests were two-tailed. Survival analysis was performed  
384 by a Mantel-Cox test. Data are represented as bar graphs representing the mean, with  
385 dot plots representing each individual data point. Errors bars are  $\pm 1$  standard error of  
386 mean. P values for  $\leq 0.05$  are reported.

387

388



## 389 **Discussion**

390 KCC2 is one of the key regulators of intracellular chloride (7, 51). However, diverse  
391 mechanisms regulate KCC2 membrane insertion and Cl<sup>-</sup> extrusion capacity (11, 12).  
392 Modulating KCC2 function to enhance inhibition has become a focused area of research  
393 to help identify therapeutic targets for pathologies with documented KCC2 degradation or  
394 hypofunction. Enhancement of KCC2 membrane stability and function could reestablish  
395 synaptic inhibition in seizing neonatal brains when positive GABAR modulators like PB  
396 fail to curb severe recurrent seizures. The goal would be to acutely rescue KCC2 function  
397 by preventing further degradation and maintaining KCC2 membrane stability. For  
398 translational applications, this strategy would target pathologies with documented KCC2  
399 hypofunction such as recent reports of significant reduction in KCC2-positive cells in  
400 postmortem cerebral samples from preterm infants with white matter injury (52). This  
401 strategy is distinct from overexpression or enhancement of KCC2 function in neurons with  
402 stable endogenous KCC2 expression which could be detrimental to developing brains  
403 (53, 54). Moderate and severe HIE seizures are clinically associated with significant  
404 hourly/daily seizure burdens which tend to cluster into high-seizing and non-seizing  
405 periods (4, 55), however they are transient in nature. This clustering phenotype makes  
406 continuous EEG monitoring during the acute period a necessity and gold standard (56,  
407 57) to determine both the true severity of the seizures and the efficacy of ASM  
408 interventions. An acute protocol of rescuing KCC2 hypofunction during this critical period  
409 would help mitigate both the refractory neonatal seizures and their long-term  
410 consequences.

411 For this reason we tested acute intervention protocols for multiple graded doses of  
412 the KCC2 functional enhancer CLP290 both as post and primed dosing in our CD-1  
413 mouse model of refractory neonatal seizures. Our seminal results show that CLP290 is  
414 significantly efficacious in reversing PB-resistant seizures at P7 in a dose-dependent  
415 manner that plateaus at the highest dose tested in this study. The ability of CLP290 to  
416 rescue both KCC2 expression and -S940 phosphorylation at 24h post-ischemia were  
417 similar to those reported with the TrkB antagonist ANA12 but also distinct since CLP290  
418 had no effect on subduing the ischemia-induced TrkB activation (17). Further its ability to  
419 significantly increase KCC2 membrane insertion in P7 brain sections and inability subdue  
420 ischemic seizures in the mutant KCC2 S940A<sup>+/+</sup> pups support its role as a KCC2  
421 functional enhancer acting through its S940 phosphorylation site.

422

### 423 **Novel anti-seizure protocols that help mitigate epileptogenesis**

424 The long-term effects of refractory seizures and ASM interventions are major  
425 factors to consider for neonatal antiseizure management (21, 22). It has been shown that  
426 chemoconvulsant induced seizures upregulate KCC2 expression (32, 58). Therefore, an  
427 initial low-dose PTZ would be expected to upregulate KCC2 in P12 naïve pups likely  
428 making them resistant to additional seizures. The proof of concept data reported here in  
429 the naïve pups for this novel assay supported this reasoning. The failure of the initial sub-  
430 threshold PTZ dose to confer this resistance in the PB-only group indicated a heightened  
431 susceptibility to epileptogenesis at P12. In contrast, the P7 CLP290 treated pups showed  
432 significant protection from this epileptogenesis. Neonatal ischemia results in ~20-40%  
433 decrease in KCC2 expression which recovers endogenously over the next few days and

434 catches up to its developmental trajectory (15). The ability to rescue KCC2 hypofunction  
435 acutely during this period could help mitigate the onset of long-term impairments in circuit  
436 function opening up a promising window for transient therapy aimed at rescuing KCC2  
437 hypofunction.

438

### 439 **KCC2 hypofunction can independently initiate and aggravate neonatal seizures**

440 To elucidate the critical role of KCC2 in neonatal seizure susceptibility, the effect  
441 of the selective KCC2 inhibitor VU was tested in naïve CD-1 pups at P7. During  
442 development KCC2 undergoes a significant increase in expression (6) associated with a  
443 phosphorylation profile that coincides with a maturational increase in Cl<sup>-</sup> extrusion  
444 capacity (23). The dose-dependent emergence of spontaneous epileptiform events with  
445 graded severity in the naïve P7 CD-1 pups highlighted the significant role of KCC2  
446 function in preventing ictogenesis in the immature brain (59). KCC2 antagonism during  
447 ischemic seizures further aggravated seizure severity at P7, supporting its role in the  
448 severity of seizure burdens. The immature brain has an inherent susceptibility to  
449 excitotoxic injury with propensity for seizures (1, 59). Our data indicate that KCC2 function  
450 in the neonatal brain plays a significant role in maintaining the balance between excitation  
451 and inhibition.

452

### 453 **Novel targets to rescue KCC2 hypofunction are needed**

454 Currently there are very few studies evaluating CLP290 efficacy in models of  
455 neurological disease and there is an urgent need for the discovery of additional novel  
456 KCC2 functional enhancers. The De Koninck group originally identified CLP257 as a

457 KCC2 functional enhancer using high throughput screening (20). The prodrug CLP290  
458 was shown to have improved pharmacokinetics over CLP257 and rescued neuropathic  
459 pain in a rat model. *In vitro* studies proposed that the active drug CLP257 does not directly  
460 modulate KCC2 activity but potentiates GABA<sub>A</sub>R activity (60, 61). Regardless, CLP290  
461 has been shown to improve outcomes in models of neuropathic pain and spinal cord injury  
462 associated with KCC2 hypofunction (20, 62, 63). The results of this current study highlight  
463 the significant role of KCC2 and its phosphorylation sites in neonatal seizure severity and  
464 mechanisms underlying CLP290 ASM efficacy using both *in vivo* and *in vitro* protocols.  
465 The identification of newer and more efficient KCC2 functional enhancers targeting these  
466 phosphorylation sites are needed.

467         The mechanisms by which CLP290 enhances KCC2 function in neurons are not  
468 well understood (20, 60, 61). We investigated the role of the known phosphorylation sites  
469 on KCC2 those that either positively or negatively regulate KCC2 membrane stability and  
470 Cl<sup>-</sup> extrusion capacity, in the two mutant mice. The S940A<sup>+/+</sup> pups not only showed an  
471 increase in seizure susceptibility to the P7 ischemic insult, but importantly we documented  
472 the occurrence of spontaneous epileptiform discharges in the naïve mutant pups at P7.  
473 S940A<sup>+/+</sup> pups did not show the age-dependent (P7 vs. P10) differences in ischemic  
474 seizure susceptibility highlighting the developmental role of S940 phosphorylation in  
475 hyperexcitability of the immature brain. The significance of this finding is highlighted in  
476 recent reports of KCC2 mutations in early-onset epileptic syndromes (9), in which mutant  
477 KCC2 is associated with a reduction in S940 phosphorylation (46) and impaired Cl<sup>-</sup>  
478 extrusion (47, 64). In contrast, T1007A<sup>+/+</sup> mice showed a resistance to post-ischemic  
479 seizure susceptibility as compared to their WT littermates following P7 ischemic insults.

480 Additionally, when the repeated-dose PTZ protocol was tested in both mutant strains at  
481 P12, the high seizure burdens and early mortality detected in S940A<sup>+/+</sup> pups and low  
482 seizure susceptibility of the T1007A<sup>+/+</sup> pups may further support the role of the two sites  
483 in the evolution of epileptogenesis following P7 neonatal seizures in the CD-1 model.

484

485 **Activation of KCC2 homeostatic compensatory mechanisms with bolus doses of**  
486 **CLP290**

487 In contrast to the graded ASM responses of CLP290 for the lower doses tested,  
488 the anti-seizure responses identified for the highest CLP290 dose (20mg/kg; both Pre  
489 and Post) tested in this study showed differences. First hour baseline seizure burdens  
490 which remained similar to ligate-only group for the lower doses of CLP290 were  
491 significantly suppressed with the post-ligation bolus dose of 20mg/kg (Suppl Fig 1). This  
492 alteration of the baseline seizure susceptibility at P7 with 20mg/kg of CLP290 took away  
493 the graded nature on the reversal of PB-refractoriness seen with the 5 vs. 10mg/kg doses  
494 (Fig.1).

495 KCC2 can autoregulate its Cl<sup>-</sup> extrusion capacity using positive and negative  
496 modulators that activate its multiple phosphorylation sites (23). It is also known that  
497 modest KCC2 hypofunction can play a significant role in the emergence of neurological  
498 disorders (37). In contrast, overexpression of KCC2 in neurons could not only be  
499 detrimental but also trigger endogenous homeostatic pathways for the negative regulation  
500 of KCC2 function. Interestingly, pushing KCC2 function beyond its physiological levels  
501 was found to be difficult in simulation studies (11). The high bolus dose of CLP290 tested  
502 here was found to activate one such endogenous mechanism by which KCC2

503 upregulation as denoted by a significant change in ischemic seizure susceptibility at P7  
504 was homeostatically countered by a significant upregulation of T1007 phosphorylation at  
505 24h. The upregulation of T1007 in the CLP290 20mg/kg treatment group was not detected  
506 in the untreated P7 CD-1 ischemia group nor the with the lower doses of CLP290 and  
507 therefore may indicate a homeostatic regulation of KCC2 function induced by CLP290  
508 high bolus dose at 24h that was independent of the initial ischemic insult. The findings of  
509 the CLP257-mediated T007 phosphorylation *in vitro* versus *in vivo* experiments indicate  
510 a temporal regulation of the homeostatic response with T1007 upregulation which needs  
511 further investigation.

512

### 513 **Novel insights for the next generation of the next generation of KCC2 enhancers**

514 Recent studies have shown that during induced status epilepticus, reduced Cl<sup>-</sup>  
515 extrusion capacity and exacerbated activity-dependent Cl<sup>-</sup> loading can result in  
516 GABAergic transmission being ictogenic (14). Optogenetic stimulation of GABAergic  
517 interneurons in this status epilepticus-like state enhanced the epileptiform activity in a  
518 GABA<sub>A</sub>R dependent manner (65) indicating GABA-mediated depolarization. These  
519 findings support data both from our model and clinical reports where the when initial  
520 loading-dose of PB fails to curb seizures, additional PB doses do not help rescue the  
521 refractoriness (2, 66). Additionally, given the toxicity of high-dose PB on neonatal brains  
522 such protocols may be counterproductive in the short and long-term (67–69).

523 KCC2 hypofunction is emerging as a significant cause underlying impaired  
524 inhibition in multiple neurological disorders (5, 52, 65). Interestingly, the research into  
525 both refractory seizures and refractory spinal nerve pain has identified KCC2

526 hypofunction as a common underlying cause. Here we have shown that enhancing KCC2  
527 function in a well-characterized preclinical model of refractory seizures can rescue not  
528 only the acute PB-refractoriness but also help mitigate epileptogenesis with early  
529 intervention. Although additional studies are needed to investigate the direct and indirect  
530 effects of enhancing Cl<sup>-</sup> extrusion capacity of KCC2 in the immature brain, the novel  
531 findings reported here highlight the role of KCC2 hypofunction and its phosphorylation  
532 sites in HIE-related refractory seizures and an evidence based focus on targeting KCC2  
533 function in development of future translational strategies.

534

535

536

537

538

539

540 **Acknowledgements:** We thank Professor Stephen J. Moss (Tufts University School of  
541 Medicine) for the generous transfer of the S940A<sup>+/+</sup> and T1007A<sup>+/+</sup> mice (MTA). We thank  
542 Dr. Tarek Deeb (Tufts University School of Medicine) and Dr. Yvonne Moore (Tufts  
543 University School of Medicine) for useful discussions and technical advice. We thank  
544 Professor Yves De Koninck (Université Laval) for generously sharing aliquots of CLP290  
545 (MTA). We thank Dr. Rana Rais from the Johns Hopkins Drug Discovery Core for the  
546 HPLC experiments.

547

548

549 **Funding**

550 Research reported in the publication was supported by the Eunice Kennedy Shriver  
551 National Institute of Child Health and Human Development of National Institutes of Health  
552 under Grant No. R01HD090884 (SDK). The content is solely the responsibility of the  
553 authors and does not necessarily represent the official view of the NIH.

554

555 **Author Contributions**

556 SDK conceived the project. BJS, PAK, BMC, and SDK acquired data. BJS, PAK, and  
557 SDK analyzed data. BJS, PAK, and SDK wrote the paper. All authors have seen and  
558 approved the manuscript, and this manuscript has not been published elsewhere.

559

560

561 **Competing Interests**

562 SDK is listed as an author on US patent 10525024B2, "Methods for rescuing  
563 phenobarbital resistance of seizures by ANA-12 or ANA-12 in combination with CLP290."

564

565

566

567

568

569

570

571



## 572 References

- 573 1. J. Volpe, T. Inder, B. Darras, L. de Vries, A. du Plessis, J. Neill, J. Perlman, *Volpe's*  
574 *Neurology of the Newborn - 6th Edition* (Elsevier, ed. 6th, 2017).
- 575 2. R. Sankar, M. J. Painter, Neonatal seizures: after all these years we still love what doesn't  
576 work. *Neurology*. **64**, 776–777 (2005).
- 577 3. H. C. Glass, J. S. Soul, C. J. Chu, S. L. Massey, C. J. Wusthoff, T. Chang, M. R. Cilio, S. L.  
578 Bonifacio, N. S. Abend, C. Thomas, M. Lemmon, C. E. McCulloch, R. A. Shellhaas,  
579 Response to antiseizure medications in neonates with acute symptomatic seizures.  
580 *Epilepsia*. **60**, e20–e24 (2019).
- 581 4. G. B. Boylan, N. J. Stevenson, S. Vanhatalo, Monitoring neonatal seizures. *Semin. Neonatal*  
582 *Med.* **18**, 202–208 (2013).
- 583 5. K. Kaila, T. J. Price, J. A. Payne, M. Puskarjov, J. Voipio, Cation-chloride cotransporters in  
584 neuronal development, plasticity and disease. *Nat Rev Neurosci.* **15**, 637–654 (2014).
- 585 6. G. Sedmak, N. Jovanov-Milošević, M. Puskarjov, M. Ulamec, B. Krušlin, K. Kaila, M.  
586 Judaš, Developmental Expression Patterns of KCC2 and Functionally Associated  
587 Molecules in the Human Brain. *Cereb. Cortex.* **26**, 4574–4589 (2016).
- 588 7. K. Kaila, T. J. Price, J. A. Payne, M. Puskarjov, J. Voipio, Cation-chloride cotransporters in  
589 neuronal development, plasticity and disease. *Nat. Rev. Neurosci.* **15**, 637–654 (2014).
- 590 8. Y. Ben-Ari, Excitatory actions of GABA during development: the nature of the nurture. *Nat*  
591 *Rev Neurosci.* **3**, 728–739 (2002).
- 592 9. P. Q. Duy, W. B. David, K. T. Kahle, Identification of KCC2 Mutations in Human Epilepsy  
593 Suggests Strategies for Therapeutic Transporter Modulation. *Front. Cell. Neurosci.* **13**  
594 (2019), doi:10.3389/fncel.2019.00515.
- 595 10. French Jacqueline A., Refractory Epilepsy: Clinical Overview. *Epilepsia.* **48**, 3–7 (2007).
- 596 11. N. Doyon, L. Vinay, S. A. Prescott, Y. De Koninck, Chloride Regulation: A Dynamic  
597 Equilibrium Crucial for Synaptic Inhibition. *Neuron.* **89**, 1157–1172 (2016).
- 598 12. B. J. Sullivan, S. D. Kadam, in *Neuronal Chloride Transporters in Health and Disease*, X.  
599 Tang, Ed. (Elsevier, ed. 1, 2020), p. 650.
- 600 13. R. Nardou, S. Yamamoto, G. Chazal, A. Bhar, N. Ferrand, O. Dulac, Y. Ben-Ari, I. Khalilov,  
601 Neuronal chloride accumulation and excitatory GABA underlie aggravation of neonatal  
602 epileptiform activities by phenobarbital. *Brain J. Neurol.* **134**, 987–1002 (2011).
- 603 14. R. J. Burman, J. S. Selfe, J. H. Lee, M. van den Berg, A. Calin, N. K. Codadu, R. Wright, S.  
604 E. Newey, R. R. Parrish, A. A. Katz, J. M. Wilmshurst, C. J. Akerman, A. J. Trevelyan, J.

- 605 V. Raimondo, Excitatory GABAergic signalling is associated with benzodiazepine  
606 resistance in status epilepticus. *Brain J. Neurol.* **142**, 3482–3501 (2019).
- 607 15. S. K. Kang, G. J. Markowitz, S. T. Kim, M. V. Johnston, S. D. Kadam, Age- and sex-  
608 dependent susceptibility to phenobarbital-resistant neonatal seizures: role of chloride co-  
609 transporters. *Front Cell Neurosci.* **9**, 173- (2015).
- 610 16. S. K. Kang, M. V. Johnston, S. D. Kadam, Acute TrkB inhibition rescues phenobarbital-  
611 resistant seizures in a mouse model of neonatal ischemia. *Eur. J. Neurosci.* **42**, 2792–2804  
612 (2015).
- 613 17. B. M. Carter, B. J. Sullivan, J. R. Landers, S. D. Kadam, Dose-dependent reversal of KCC2  
614 hypofunction and phenobarbital-resistant neonatal seizures by ANA12. *Sci. Rep.* **8**, 11987  
615 (2018).
- 616 18. S. K. Kang, S. Ammanuel, S. Thodupunuri, D. A. Adler, M. V. Johnston, S. D. Kadam,  
617 Sleep dysfunction following neonatal ischemic seizures are differential by neonatal age of  
618 insult as determined by qEEG in a mouse model. *Neurobiol. Dis.* **116**, 1–12 (2018).
- 619 19. S. K. Kang, S. Ammanuel, D. A. Adler, S. D. Kadam, Rescue of PB-resistant neonatal  
620 seizures with single-dose of small-molecule TrkB antagonist show long-term benefits.  
621 *Epilepsy Res.* **159**, 106249 (2020).
- 622 20. M. Gagnon, M. J. Bergeron, G. Lavertu, A. Castonguay, S. Tripathy, R. P. Bonin, J. Perez-  
623 Sanchez, D. Boudreau, B. Wang, L. Dumas, I. Valade, K. Bachand, M. Jacob-Wagner, C.  
624 Tardif, I. Kianicka, P. Isenring, G. Attardo, J. A. M. Coull, Y. De Koninck, Chloride  
625 extrusion enhancers as novel therapeutics for neurological diseases. *Nat. Med.* **19**, 1524–  
626 1528 (2013).
- 627 21. H. C. Glass, Z. M. Grinspan, R. A. Shellhaas, Outcomes after acute symptomatic seizures in  
628 neonates. *Semin. Fetal. Neonatal Med.* **23**, 218–222 (2018).
- 629 22. S. K. Kang, S. D. Kadam, Neonatal Seizures: Impact on Neurodevelopmental Outcomes.  
630 *Front Pediatr.* **3**, 101- (2015).
- 631 23. Y. E. Moore, L. C. Conway, N. J. Brandon, T. Z. Deeb, S. J. Moss, Developmental  
632 regulation of KCC2 phosphorylation has long-term impacts on cognitive function. *Front.*  
633 *Mol. Neurosci.* **12** (2019), doi:10.3389/fnmol.2019.00173.
- 634 24. Y. E. Moore, T. Z. Deeb, H. Chadchankar, N. J. Brandon, S. J. Moss, Potentiating KCC2  
635 activity is sufficient to limit the onset and severity of seizures. *Proc. Natl. Acad. Sci.* **115**,  
636 10166–10171 (2018).
- 637 25. L. Silayeva, T. Z. Deeb, R. M. Hines, M. R. Kelley, M. B. Munoz, H. H. C. Lee, N. J.  
638 Brandon, J. Dunlop, J. Maguire, P. A. Davies, S. J. Moss, KCC2 activity is critical in  
639 limiting the onset and severity of status epilepticus. *Proc. Natl. Acad. Sci. U. S. A.* **112**,  
640 3523–3528 (2015).

- 641 26. P. A. Kipnis, B. J. Sullivan, B. M. Carter, S. D. Kadam, TrkB agonists prevent postischemic  
642 emergence of refractory neonatal seizures in mice. *JCI Insight*. **5** (2020),  
643 doi:10.1172/jci.insight.136007.
- 644 27. S. C. Kharod, S. K. Kang, S. D. Kadam, Off-label use of bumetanide for brain disorders: An  
645 overview. *Front. Neurosci.* **13** (2019), doi:10.3389/fnins.2019.00310.
- 646 28. M. Puskarjov, K. T. Kahle, E. Ruusuvuori, K. Kaila, Pharmacotherapeutic targeting of  
647 cation-chloride cotransporters in neonatal seizures. *Epilepsia*. **55**, 806–818 (2014).
- 648 29. C. P. Panayiotopoulos, *Neonatal Seizures and Neonatal Syndromes* (Bladon Medical  
649 Publishing, 2005; <https://www.ncbi.nlm.nih.gov/books/NBK2599/>).
- 650 30. E. Kossoff, Neonatal Seizures Due to Hypoxic-Ischemic Encephalopathy: Should We Care?  
651 *Epilepsy Curr.* **11**, 147–148 (2011).
- 652 31. S. K. Kang, S. Ammanuel, S. Thodupunuri, D. A. Adler, M. V. Johnston, S. D. Kadam,  
653 Sleep dysfunction following neonatal ischemic seizures are differential by neonatal age of  
654 insult as determined by qEEG in a mouse model. *Neurobiol. Dis.* **116**, 1–12 (2018).
- 655 32. S. C. Kharod, B. M. Carter, S. D. Kadam, Pharmaco-resistant neonatal seizures: critical  
656 mechanistic insights from a chemoconvulsant model. *Dev. Neurobiol.* (2018),  
657 doi:10.1002/dneu.22634.
- 658 33. S. Sivakumaran, R. A. Cardarelli, J. Maguire, M. R. Kelley, L. Silayeva, D. H. Morrow, J.  
659 Mukherjee, Y. E. Moore, R. J. Mather, M. E. Duggan, N. J. Brandon, J. Dunlop, S. Zicha,  
660 S. J. Moss, T. Z. Deeb, Selective Inhibition of KCC2 Leads to Hyperexcitability and  
661 Epileptiform Discharges in Hippocampal Slices and In Vivo. *J. Neurosci.* **35**, 8291–8296  
662 (2015).
- 663 34. C. Rivera, J. Voipio, J. Thomas-Crusells, H. Li, Z. Emri, S. Sipilä, J. A. Payne, L.  
664 Minichiello, M. Saarma, K. Kaila, Mechanism of Activity-Dependent Downregulation of  
665 the Neuron-Specific K-Cl Cotransporter KCC2. *J. Neurosci.* **24**, 4683–4691 (2004).
- 666 35. H. R. Pathak, F. Weissinger, M. Terunuma, G. C. Carlson, F.-C. Hsu, S. J. Moss, D. A.  
667 Coulter, Disrupted Dentate Granule Cell Chloride Regulation Enhances Synaptic  
668 Excitability during Development of Temporal Lobe Epilepsy. *J. Neurosci.* **27**, 14012–  
669 14022 (2007).
- 670 36. L. Silayeva, T. Z. Deeb, R. M. Hines, M. R. Kelley, M. B. Munoz, H. H. C. Lee, N. J.  
671 Brandon, J. Dunlop, J. Maguire, P. A. Davies, S. J. Moss, KCC2 activity is critical in  
672 limiting the onset and severity of status epilepticus. *Proc. Natl. Acad. Sci. U. S. A.* **112**,  
673 3523–3528 (2015).
- 674 37. N. Doyon, S. A. Prescott, Y. De Koninck, Mild KCC2 Hypofunction Causes Inconspicuous  
675 Chloride Dysregulation that Degrades Neural Coding. *Front. Cell. Neurosci.* **9** (2016),  
676 doi:10.3389/fncel.2015.00516.

- 677 38. H. H. C. Lee, J. A. Walker, J. R. Williams, R. J. Goodier, J. A. Payne, S. J. Moss, Direct  
678 Protein Kinase C-dependent Phosphorylation Regulates the Cell Surface Stability and  
679 Activity of the Potassium Chloride Cotransporter KCC2. *J. Biol. Chem.* **282**, 29777–29784  
680 (2007).
- 681 39. H. H. Lee, T. Z. Deeb, J. A. Walker, P. A. Davies, S. J. Moss, NMDA receptor activity  
682 downregulates KCC2 resulting in depolarizing GABA(A) receptor mediated currents. *Nat.*  
683 *Neurosci.* **14**, 736–743 (2011).
- 684 40. J. Rinehart, Y. D. Maksimova, J. E. Tanis, K. L. Stone, C. A. Hodson, J. Zhang, M. Risinger,  
685 W. Pan, D. Wu, C. M. Colangelo, B. Forbush, C. H. Joiner, E. E. Gulcicek, P. G. Gallagher,  
686 R. P. Lifton, Sites of regulated phosphorylation that control K-Cl cotransporter activity.  
687 *Cell.* **138**, 525–536 (2009).
- 688 41. S. Titz, E. M. Sammler, S. G. Hormuzdi, Could tuning of the inhibitory tone involve graded  
689 changes in neuronal chloride transport? *Neuropharmacology.* **95**, 321–331 (2015).
- 690 42. L. C. Conway, R. A. Cardarelli, Y. E. Moore, K. Jones, L. J. McWilliams, D. J. Baker, M. P.  
691 Burnham, R. W. Bürli, Q. Wang, N. J. Brandon, S. J. Moss, T. Z. Deeb, N-Ethylmaleimide  
692 increases KCC2 cotransporter activity by modulating transporter phosphorylation. *J. Biol.*  
693 *Chem.* **292**, 21253–21263 (2017).
- 694 43. Y. E. Moore, M. R. Kelley, N. J. Brandon, T. Z. Deeb, S. J. Moss, Seizing Control of KCC2:  
695 A New Therapeutic Target for Epilepsy. *Trends Neurosci.* **40**, 555–571 (2017).
- 696 44. N.-S. Woo, J. Lu, R. England, R. McClellan, S. Dufour, D. B. Mount, A. Y. Deutch, D. M.  
697 Lovinger, E. Delpire, Hyperexcitability and epilepsy associated with disruption of the  
698 mouse neuronal-specific K-Cl cotransporter gene. *Hippocampus.* **12**, 258–268 (2002).
- 699 45. C. A. Hubner, Disruption of KCC2 reveals an essential role of K-Cl cotransport already in  
700 early synaptic inhibition. *Neuron.* **30**, 515–524 (2001).
- 701 46. K. T. Kahle, N. D. Merner, P. Friedel, L. Silayeva, B. Liang, A. Khanna, Y. Shang, P.  
702 Lachance-Touchette, C. Bourassa, A. Levert, P. A. Dion, B. Walcott, D. Spiegelman, A.  
703 Dionne-Laporte, A. Hodgkinson, P. Awadalla, H. Nikbakht, J. Majewski, P. Cossette, T. Z.  
704 Deeb, S. J. Moss, I. Medina, G. A. Rouleau, Genetically encoded impairment of neuronal  
705 KCC2 cotransporter function in human idiopathic generalized epilepsy. *EMBO Rep.* **15**,  
706 766–774 (2014).
- 707 47. M. Puskarjov, P. Seja, S. E. Heron, T. C. Williams, F. Ahmad, X. Iona, K. L. Oliver, B. E.  
708 Grinton, L. Vutskits, I. E. Scheffer, S. Petrou, P. Blaesse, L. M. Dibbens, S. F. Berkovic, K.  
709 Kaila, A variant of KCC2 from patients with febrile seizures impairs neuronal Cl-  
710 extrusion and dendritic spine formation. *EMBO Rep.* **15**, 723–729 (2014).
- 711 48. L. I. Pisella, J.-L. Gaiarsa, D. Diabira, J. Zhang, I. Khalilov, J. Duan, K. T. Kahle, I. Medina,  
712 Impaired regulation of KCC2 phosphorylation leads to neuronal network dysfunction and  
713 neurodevelopmental pathology. *Sci. Signal.* **12** (2019), doi:10.1126/scisignal.aay0300.

- 714 49. M. Watanabe, J. Zhang, M. S. Mansuri, J. Duan, J. K. Karimy, E. Delpire, S. L. Alper, R. P.  
715 Lifton, A. Fukuda, K. T. Kahle, Developmentally regulated KCC2 phosphorylation is  
716 essential for dynamic GABA-mediated inhibition and survival. *Sci. Signal.* **12** (2019),  
717 doi:10.1126/scisignal.aaw9315.
- 718 50. L. Nashef, E. L. So, P. Ryvlin, T. Tomson, Unifying the definitions of sudden unexpected  
719 death in epilepsy. *Epilepsia.* **53**, 227–233 (2012).
- 720 51. G. Gamba, Molecular Physiology and Pathophysiology of Electroneutral Cation-Chloride  
721 Cotransporters. *Physiol. Rev.* **85**, 423–493 (2005).
- 722 52. S. Robinson, I. Mikolaenko, I. Thompson, M. L. Cohen, M. Goyal, Loss of Cation-Chloride  
723 Cotransporter Expression in Preterm Infants With White Matter Lesions: Implications for  
724 the Pathogenesis of Epilepsy. *J. Neuropathol. Exp. Neurol.* **69**, 565–572 (2010).
- 725 53. K. T. Kahle, K. J. Staley, B. V. Nahed, G. Gamba, S. C. Hebert, R. P. Lifton, D. B. Mount,  
726 Roles of the cation-chloride cotransporters in neurological disease. *Nat Clin Pr. Neuro.* **4**,  
727 490–503 (2008).
- 728 54. S. Hamidi, M. Avoli, KCC2 function modulates in vitro ictogenesis. *Neurobiol. Dis.* **79**, 51–  
729 58 (2015).
- 730 55. G. B. Boylan, R. M. Pressler, Neonatal seizures: the journey so far. *Semin. Neonatal Med.*  
731 **18**, 173–174 (2013).
- 732 56. G. B. Boylan, N. J. Stevenson, S. Vanhatalo, Monitoring neonatal seizures. *Semin. Fetal.*  
733 *Neonatal Med.* **18**, 202–208 (2013).
- 734 57. G. B. Boylan, J. M. Rennie, R. M. Pressler, G. Wilson, M. Morton, C. D. Binnie,  
735 Phenobarbitone, neonatal seizures, and video-EEG. *Arch. Dis. Child. - Fetal Neonatal Ed.*  
736 **86**, F165–F170 (2002).
- 737 58. M. Puskarjov, F. Ahmad, S. Khirug, S. Sivakumaran, K. Kaila, P. Blaesse, BDNF is required  
738 for seizure-induced but not developmental up-regulation of KCC2 in the neonatal  
739 hippocampus. *Neuropharmacology.* **88**, 103–109 (2015).
- 740 59. S. N. Rakhade, F. E. Jensen, Epileptogenesis in the immature brain: emerging mechanisms.  
741 *Nat. Rev. Neurol.* **5**, 380–391 (2009).
- 742 60. R. A. Cardarelli, K. Jones, L. I. Pisella, H. J. Wobst, L. J. McWilliams, P. M. Sharpe, M. P.  
743 Burnham, D. J. Baker, I. Chudotvorova, J. Guyot, L. Silayeva, D. H. Morrow, N. Dekker,  
744 S. Zicha, P. A. Davies, J. Holenz, M. E. Duggan, J. Dunlop, R. J. Mather, Q. Wang, I.  
745 Medina, N. J. Brandon, T. Z. Deeb, S. J. Moss, The small molecule CLP257 does not  
746 modify activity of the K<sup>+</sup>-Cl<sup>-</sup> co-transporter KCC2 but does potentiate GABAA receptor  
747 activity. *Nat. Med.* **23**, 1394–1396 (2017).
- 748 61. M. Gagnon, M. J. Bergeron, J. Perez-Sanchez, I. Plasencia-Fernández, L.-E. Lorenzo, A. G.  
749 Godin, A. Castonguay, R. P. Bonin, Y. De Koninck, Reply to The small molecule CLP257



- 750 does not modify activity of the K<sup>+</sup>–Cl<sup>–</sup> co-transporter KCC2 but does potentiate GABA  
751 A receptor activity. *Nat. Med.* **23**, 1396–1398 (2017).
- 752 62. B. Chen, Y. Li, B. Yu, Z. Zhang, B. Brommer, P. R. Williams, Y. Liu, S. V. Hegarty, S.  
753 Zhou, J. Zhu, H. Guo, Y. Lu, Y. Zhang, X. Gu, Z. He, Reactivation of Dormant Relay  
754 Pathways in Injured Spinal Cord by KCC2 Manipulations. *Cell*. **174**, 521-535.e13 (2018).
- 755 63. J. C. S. Mapplebeck, L.-E. Lorenzo, K. Y. Lee, C. Gauthier, M. M. Muley, Y. De Koninck,  
756 S. A. Prescott, M. W. Salter, Chloride Dysregulation through Downregulation of KCC2  
757 Mediates Neuropathic Pain in Both Sexes. *Cell Rep.* **28**, 590-596.e4 (2019).
- 758 64. H. Saitsu, M. Watanabe, T. Akita, C. Ohba, K. Sugai, W. P. Ong, H. Shiraishi, S. Yuasa, H.  
759 Matsumoto, K. T. Beng, S. Saitoh, S. Miyatake, M. Nakashima, N. Miyake, M. Kato, A.  
760 Fukuda, N. Matsumoto, Impaired neuronal KCC2 function by biallelic SLC12A5 mutations  
761 in migrating focal seizures and severe developmental delay. *Sci. Rep.* **6**, 30072 (2016).
- 762 65. V. Magloire, J. Cornford, A. Lieb, D. M. Kullmann, I. Pavlov, KCC2 overexpression  
763 prevents the paradoxical seizure-promoting action of somatic inhibition. *Nat. Commun.* **10**,  
764 1225 (2019).
- 765 66. L. A. Slaughter, A. D. Patel, J. L. Slaughter, Pharmacological Treatment of Neonatal  
766 Seizures: A Systematic Review. *J. Child Neurol.* **28**, 351–364 (2013).
- 767 67. G. J. Markowitz, S. D. Kadam, D. R. Smith, M. V. Johnston, A. M. Comi, Different effects  
768 of high- and low-dose phenobarbital on post-stroke seizure suppression and recovery in  
769 immature CD1 mice. *Epilepsy Res.* **94**, 138–148 (2011).
- 770 68. J. R. Farwell, Y. J. Lee, D. G. Hirtz, S. I. Sulzbacher, J. H. Ellenberg, K. B. Nelson,  
771 Phenobarbital for Febrile Seizures — Effects on Intelligence and on Seizure Recurrence. *N.*  
772 *Engl. J. Med.* **322**, 364–369 (1990).
- 773 69. S. Sulzbacher, J. R. Farwell, N. Temkin, A. S. Lu, D. G. Hirtz, Late cognitive effects of early  
774 treatment with phenobarbital. *Clin. Pediatr. (Phila.)*. **38**, 387–394 (1999).
- 775 70. X. Tang, *Neuronal Chloride Transporters in Health and Disease* (Elsevier, ed. 1, 2020).
- 776 71. B. J. Sullivan, S. D. Kadam, in *Experimental and Translational Models to Screen Drugs*  
777 *Effective Against Seizures and Epilepsy* (Springer Nature, 2020), *Neuromethods book*  
778 *series*.

779

780

781

782

783 **Figure 1**

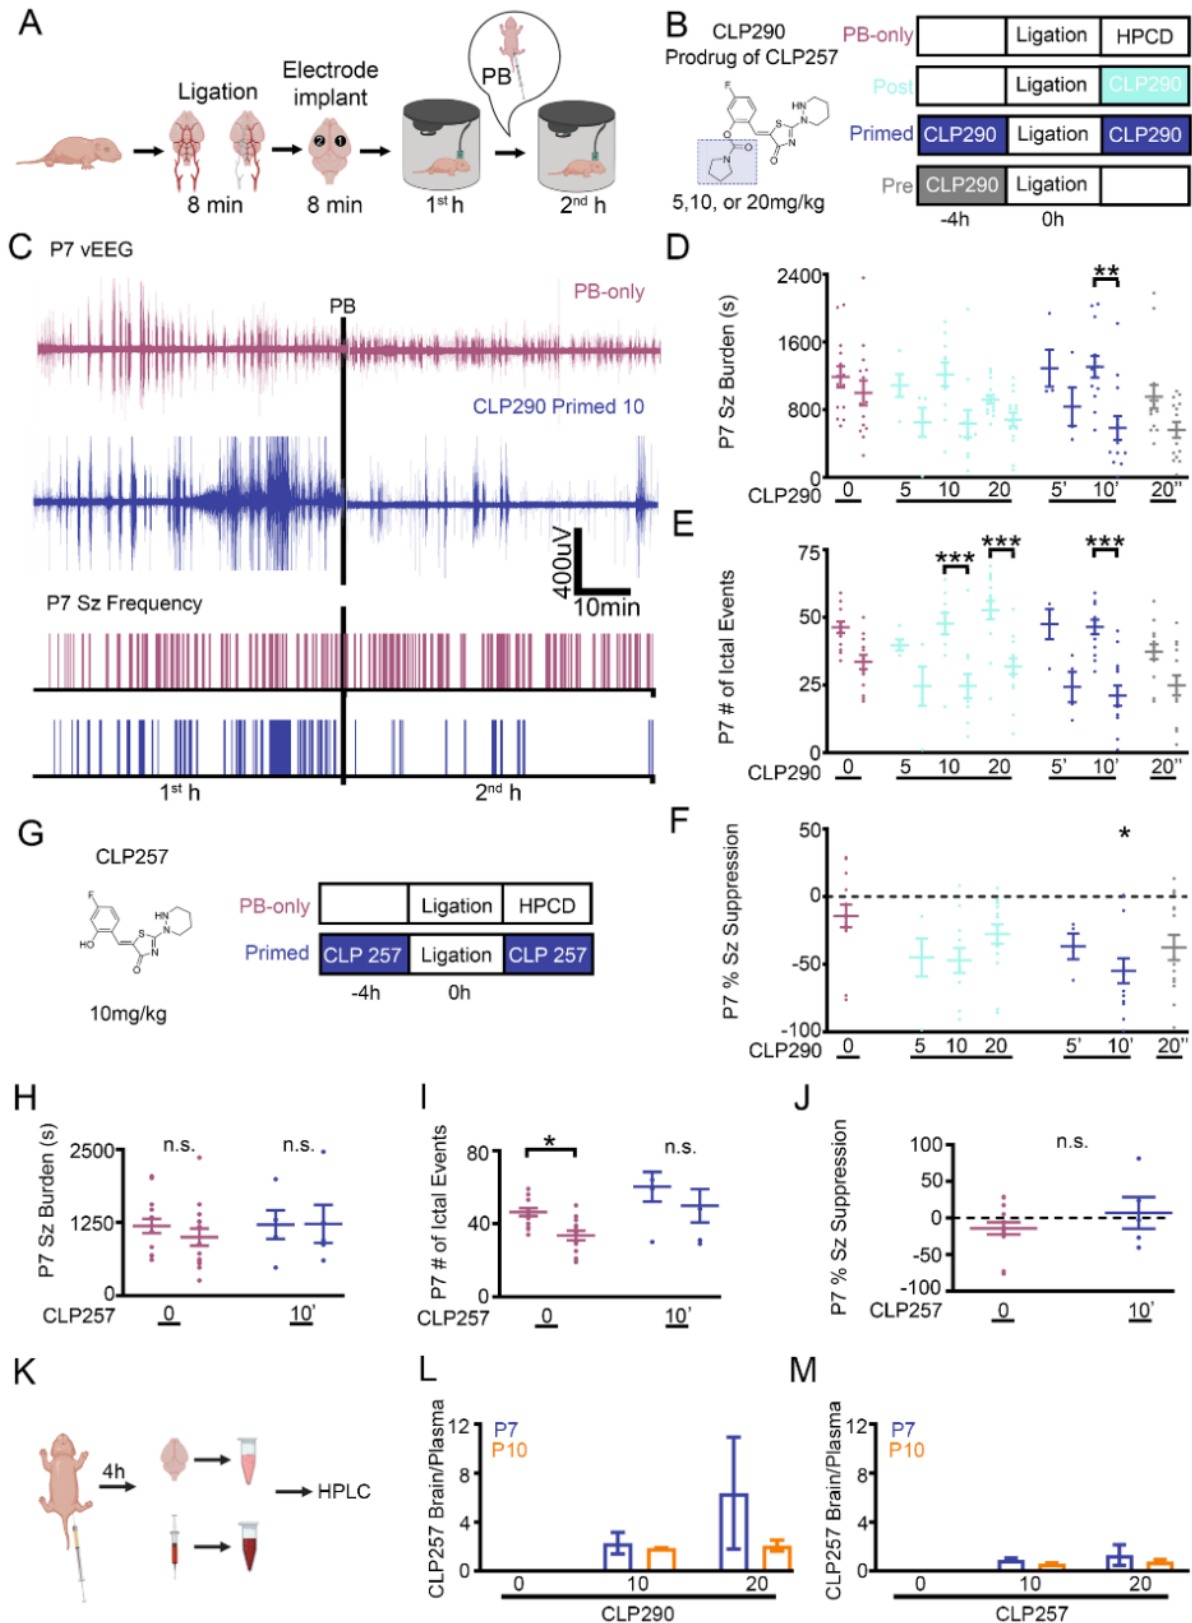

784

785 **Fig. 1. CLP290 rescued phenobarbital-resistant neonatal seizures in P7-CD1 mice.**

786 **(A)** Experimental design of a P7 CD-1 mouse model of ischemic neonatal seizures with  
787 continuous vEEG. Recording (1) and reference (2) electrodes over bilateral parietal  
788 cortices, with a ground electrode over the rostrum. **(B)** Doses and treatment protocols to  
789 evaluate CLP290, a prodrug of the proposed KCC2 functional enhancer CLP257. **(C)**  
790 Representative EEG traces and seizure frequency raster plots of a PB-only and CLP290  
791 10' pup. Black bars represent a loading dose of PB (25mg/kg; intraperitoneal injection).  
792 **(D)** 1<sup>st</sup> and 2<sup>nd</sup> hour seizure burdens, **(E)** 1<sup>st</sup> and 2<sup>nd</sup> hour ictal events, and **(F)** 1<sup>st</sup> vs. 2<sup>nd</sup>  
793 hour percent seizure suppression after P7 unilateral carotid ligation. Percent seizure  
794 suppression was analyzed by one-way ANOVA vs. PB-only. PB-only n=14; CLP290 5  
795 n=5; CLP290 10 n=11; CLP290 20 n=15; CLP290 5' n=4; CLP290 10' n=13; CLP290 20'  
796 n=14. **(G)** Doses and treatment protocols to evaluate CLP257 (n=5). **(H)** Seizure burdens,  
797 **(I)** ictal events, and **(J)** percent seizure suppression at P7 after unilateral carotid ligation.  
798 **(K)** Experimental paradigm to investigate the pharmacokinetic profile of CLP290 and  
799 CLP257. **(L)** CLP257 brain to plasma ratio after CLP290 administration (I.P., n=2 per  
800 group). **(M)** CLP257 brain to plasma ratio after CLP257 administration (I.P.; n=2 per  
801 group). Plots show all data points with means  $\pm$ SEM. \*P<0.05; \*\*P<0.01; \*\*\*P<0.001, two-  
802 way ANOVA.

803

804

805

806

807



808 **Figure 2**

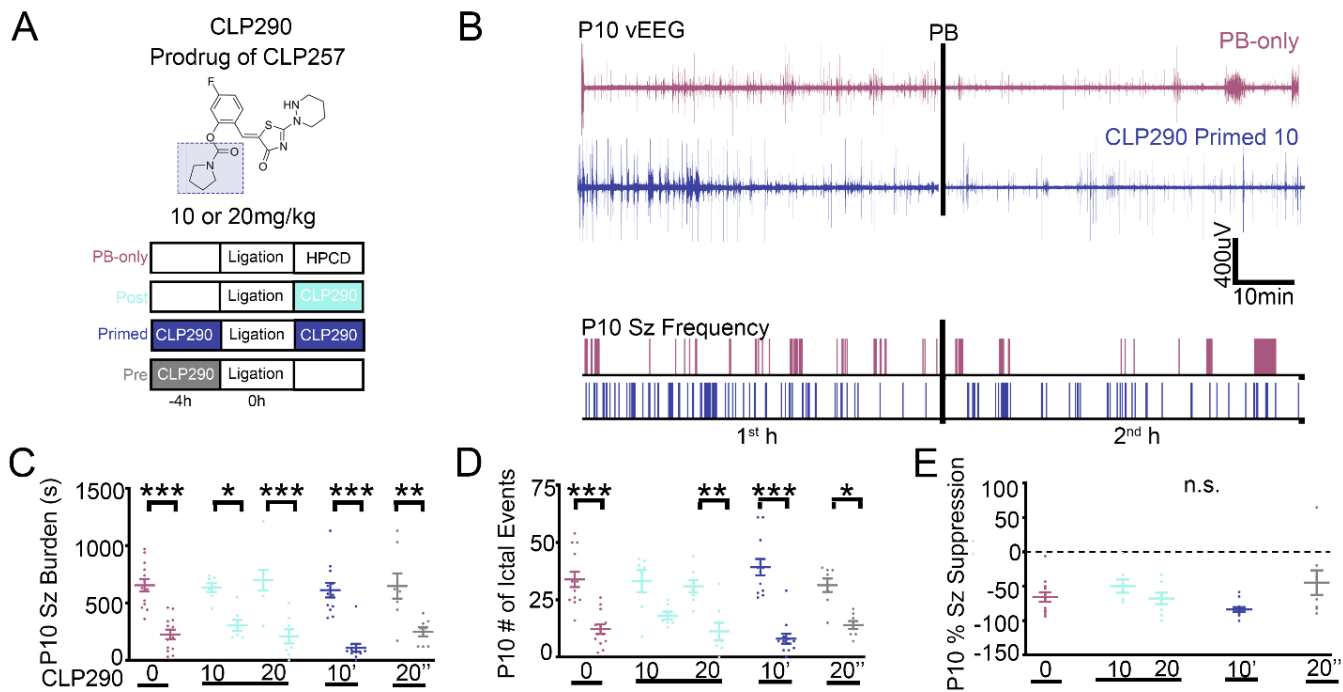

809

810

811

812

813

814

815

816

817

818

819

820

821 **Fig.2. Ischemic neonatal seizures in P10 CD1 pups were phenobarbital-**  
822 **responsive. (A)** Doses and treatment protocols to evaluate CLP290 in P10 CD-1 pups.  
823 **(B)** Representative EEG traces and seizure frequency raster plots of a P10 phenobarbital-  
824 only and CLP290 10' pup. Black bars represent a loading dose of PB (25mg/kg;  
825 intraperitoneal injection). **(C)** 1<sup>st</sup> and 2<sup>nd</sup> hour seizure burdens, **(D)** 1<sup>st</sup> and 2<sup>nd</sup> hour ictal  
826 events. **(E)** CLP290 does not improve seizure suppression at P10. 1<sup>st</sup> vs. 2<sup>nd</sup> hour percent  
827 seizure suppression after unilateral carotid ligation at P10. Percent seizures suppression  
828 was analyzed by one-way ANOVA vs. PB-only. Plots show all data points with means  
829  $\pm$ SEM. \*P<0.05; \*\*P<0.01; \*\*\*P<0.001, two-way ANOVA. PB-only; n=13; CLP290 10 n=7;  
830 CLP290 20 n=8; CLP290 10' n=12; CLP290 20" n=8.

831

832

833

834

835

836

837

838

839

840

841

842

843

844 **Figure 3**

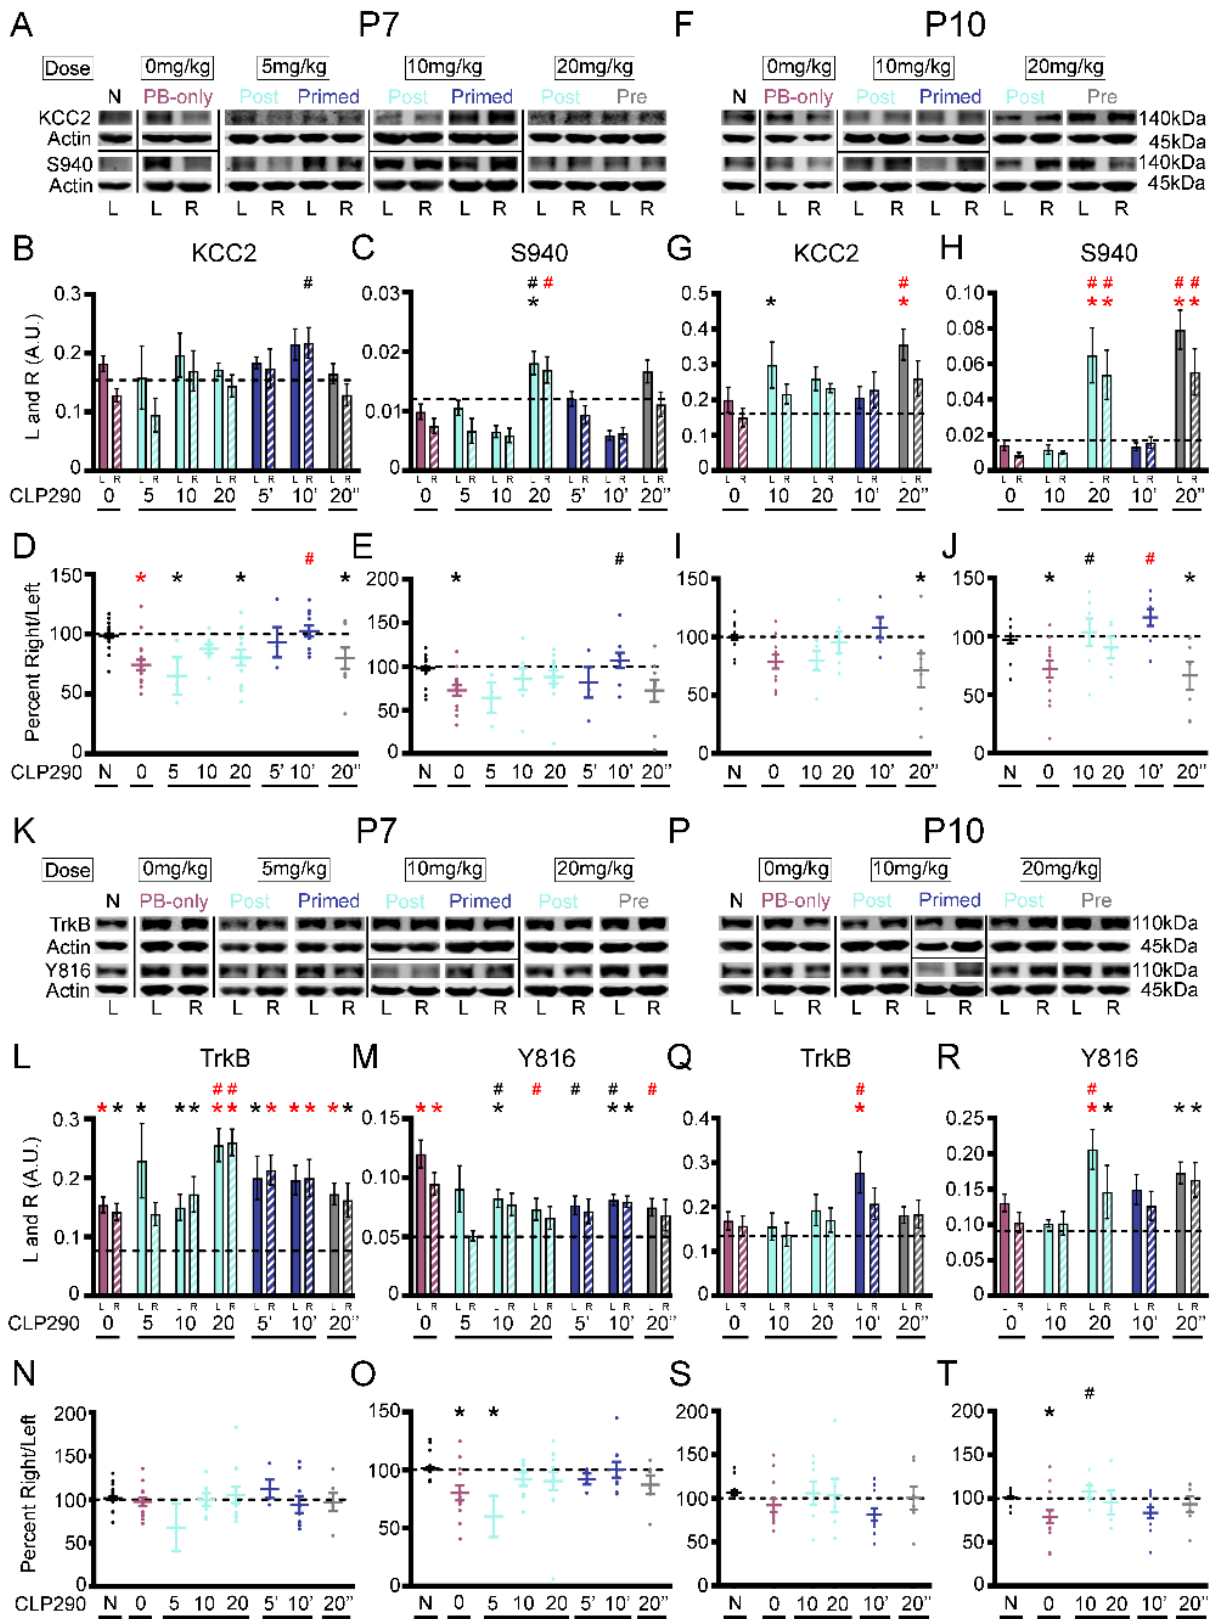

845

846

847 **Fig. 3. CLP290 rescued post-ischemic KCC2 downregulation but not TrkB**

848 **activation. (A)** Representative Western blots of KCC2 and S940 protein expression 24h

849 after P7 ischemic seizures. **(B)** KCC2 and **(C)** S940 expression in left (L) and right (R)

850 hemispheres. **(D)** KCC2 and **(E)** S940 expression as percent ipsilateral/contralateral

851 (R/L). **(F)** Representative Western blots of KCC2 and S940 expression 24h after P10

852 ischemic seizures. **(G)** KCC2 and **(H)** S940 expression in L and R hemispheres. **(I)** KCC2

853 and **(J)** S940 expression as percent R/L. **(K)** Representative Western blots of TrkB and

854 Y816 expression 24h after P7 ischemic seizures. **(L)** TrkB and **(M)** Y816 expression in L

855 and R hemispheres. **(N)** TrkB and **(O)** Y816 expression as percent R/L. **(P)**

856 Representative Western blots of TrkB and Y816 expression 24h after P10 ischemic

857 seizures. **(Q)** TrkB and **(R)** Y816 expression in L and R hemispheres. **(S)** TrkB and **(T)**

858 Y816 expression as percent R/L. Data plots show means  $\pm$ SEM. All proteins of interest

859 were normalized to housekeeping protein  $\beta$ -actin. Phosphoproteins were normalized to

860 their respective total protein. \* $P < 0.05$  and \* $P < 0.001$  by 1-way ANOVA vs. Naive. # $P < 0.05$

861 and # $P < 0.001$  vs. PB-Only. P7 pups: Naïve  $n = 27$ ; PB-only  $n = 18$ ; 5 Post  $n = 3$ ; 10 Post

862  $n = 9$ ; 20 Post  $n = 13$ ; 5',  $n = 4$ ; 10',  $n = 11$ ; 20 Pre  $n = 9$ . P10 pups: Naïve  $n = 18$ , PB-only  $n = 11$ ,

863 10 Post  $n = 6$ , 20 Post  $n = 6$ , 10 Primed  $n = 5$ , 20 Pre  $n = 7$ .

864

865

866

867

868

869 **Figure 4**

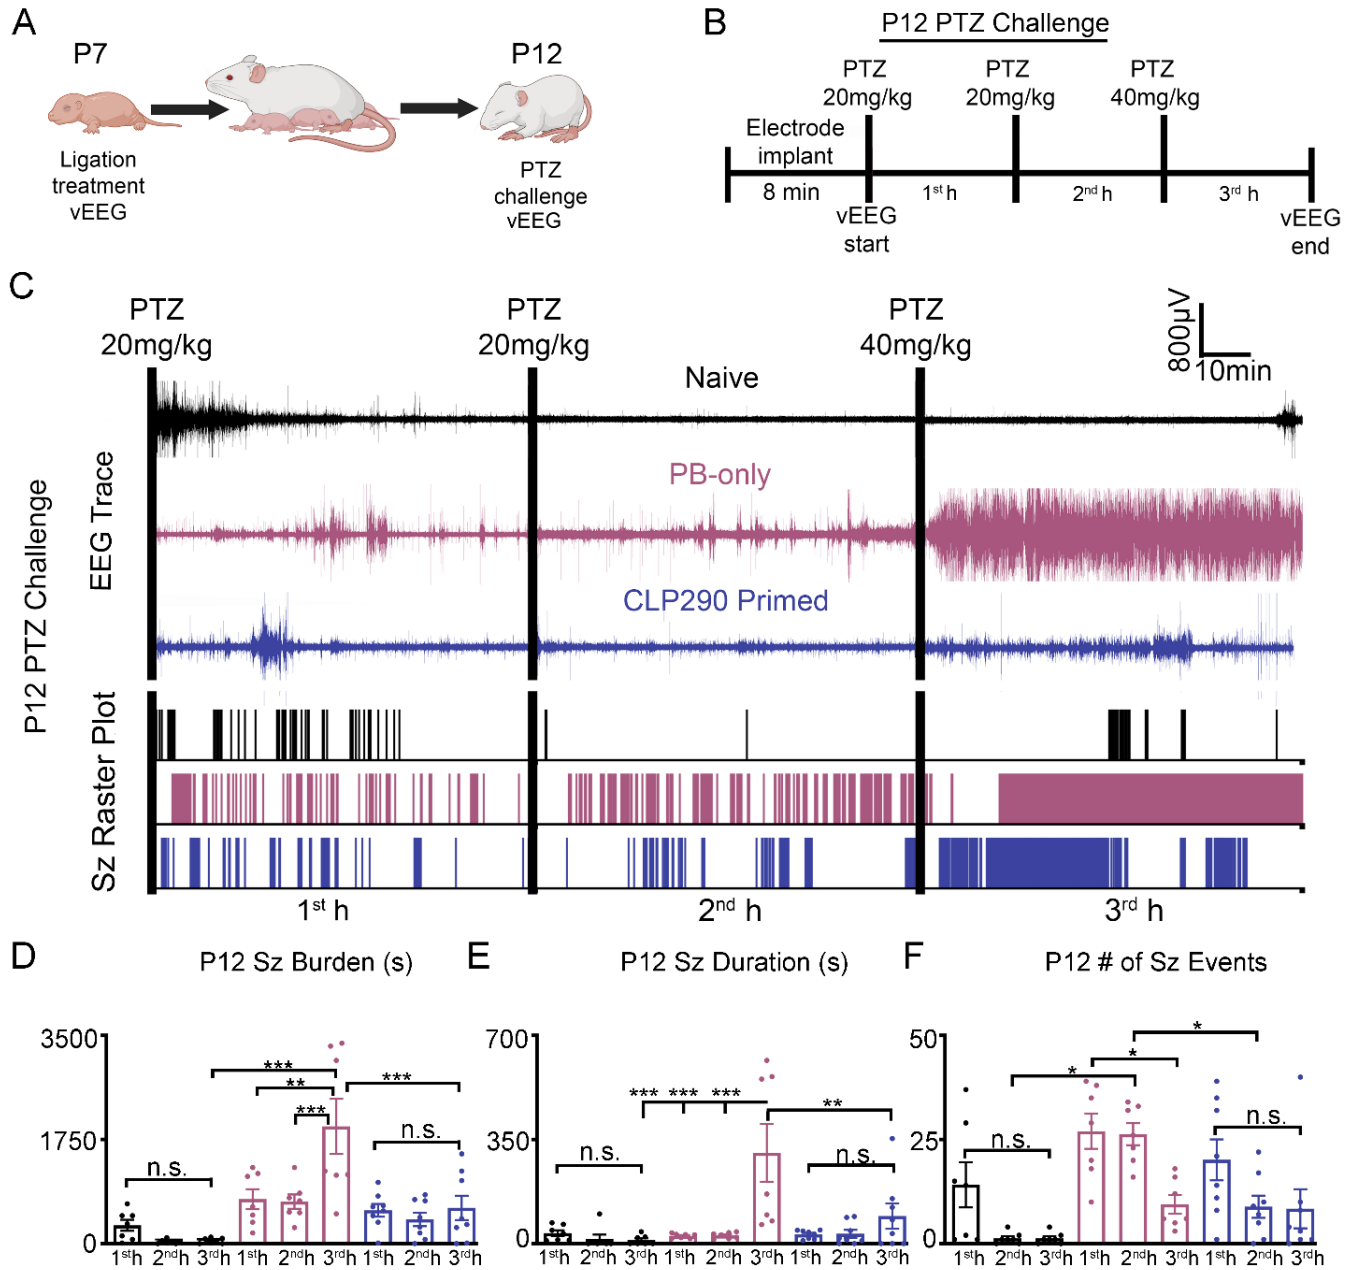

870

871

872

873

874

875 **Fig. 4. CLP290-mediated regression of epileptogenesis detected using a PTZ**  
876 **challenge. (A)** Schematic to investigate the developmental benefits of CLP290 10'  
877 treatment for P7 ischemic seizures. **(B)** P12 pentylenetetrazol (PTZ) challenge to  
878 evaluate epileptogenesis. **(C)** Representative EEG traces and seizure frequency raster  
879 plots for P12 pups that underwent Naïve, PB-only, or CLP290 10' treatment at P7. Black  
880 bars indicate intraperitoneal PTZ injections. **(D)** 1<sup>st</sup>, 2<sup>nd</sup>, and 3<sup>rd</sup> hour seizure burdens at  
881 P12 in CD-1 mice after PTZ injections. **(E)** Total electrographic seizure burdens over the  
882 three hours of vEEG recording. **(F)** Total seizure events over three hours of vEEG  
883 recording. Data plots show all data points with means  $\pm$ SEM. \*P<0.05; \*\*P<0.01;  
884 \*\*\*P<0.001 by 2-way ANOVA. Naïve n=7; PB-only n=7; CLP290 10' n=8.

885

886

887

888

889

890

891

892

893

894

895

896

897

898 **Figure 5**

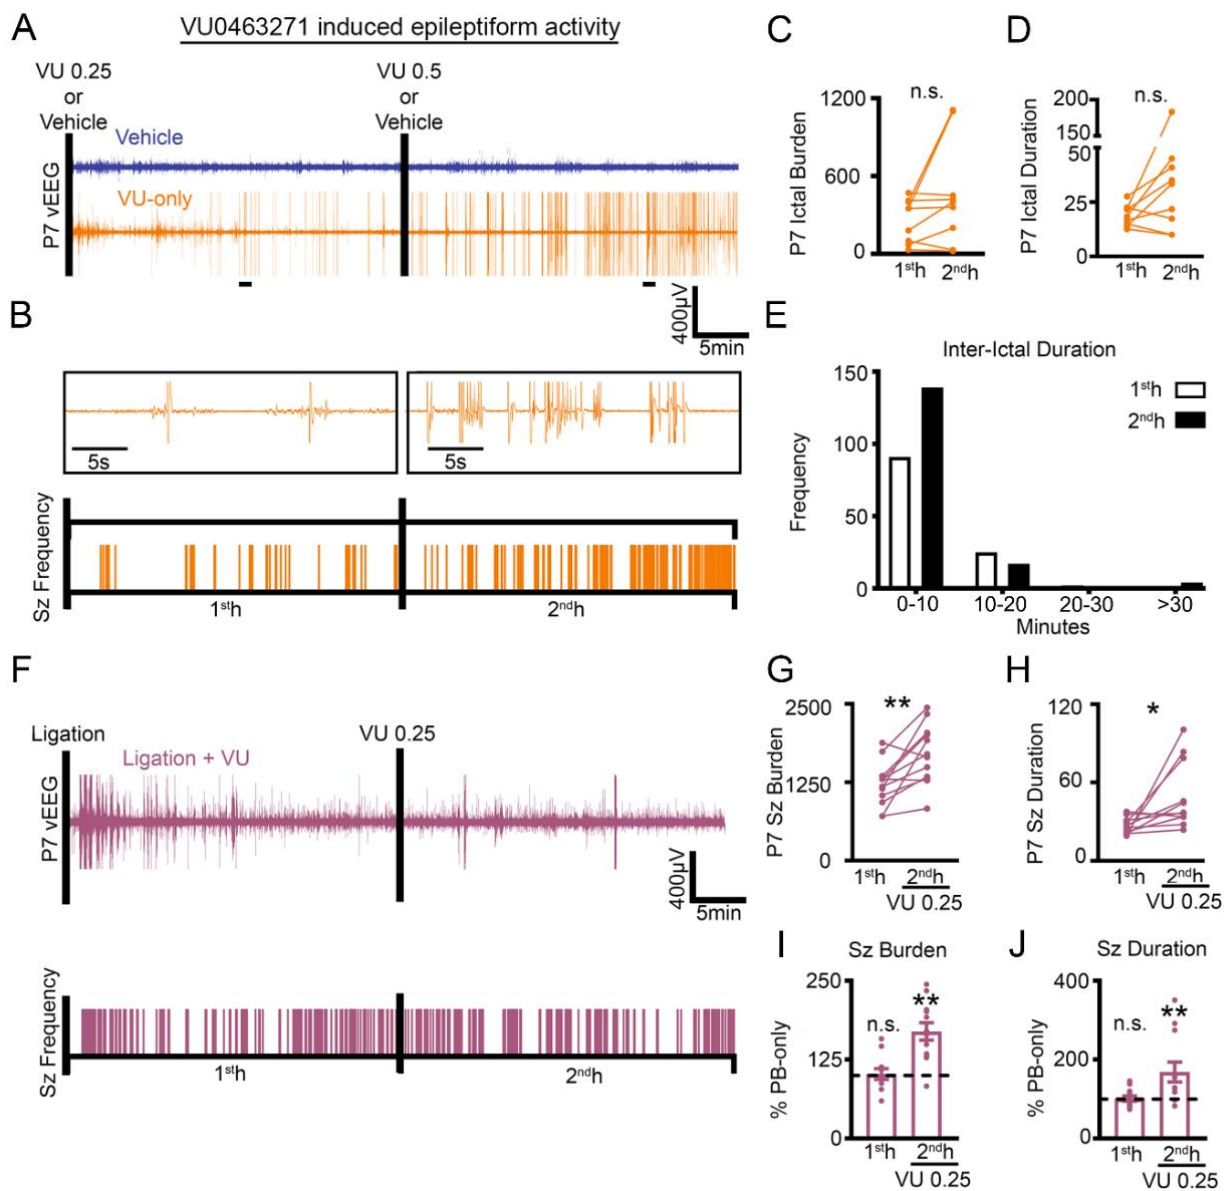

899

900

901

902

903

904

905

906 **Fig. 5. Selective KCC2 antagonist VU induced spontaneous epileptiform**  
907 **discharges in P7 pups. (A)** Representative EEG traces and **(B)** ictal event frequency  
908 raster plots from P7 CD-1 pups that either underwent vehicle or VU0463271 (VU)  
909 administration. Black bars represent intraperitoneal injections. Expanded timescales  
910 show VU induced epileptiform activity in the first and second hour. **(C)** 1<sup>st</sup> vs. 2<sup>nd</sup> hour ictal  
911 burden and **(D)** ictal duration after VU administration. **(E)** Total frequency distribution for  
912 all interictal durations in P7 CD-1 pups administered VU. Vehicle (n=4) VU administration  
913 (n=8). **(F-J)** VU aggravated ischemic neonatal seizure burdens. **(F)** Representative EEG  
914 trace and seizure frequency raster plot of a P7 CD-1 pup that underwent unilateral carotid  
915 ligation with administration of VU 0.25mg/kg at 1h (denoted by black bar). **(G)** 1<sup>st</sup> and 2<sup>nd</sup>  
916 h seizure burden and **(H)** 1<sup>st</sup> and 2<sup>nd</sup> h seizure duration for P7 CD-1 pups that underwent  
917 unilateral carotid ligation with administration of VU0.25mg/kg at 1h. **(I)** 1<sup>st</sup> and 2<sup>nd</sup> hour  
918 seizure burden and **(J)** duration plotted as percent PB-only. Data plots show all data  
919 points with means  $\pm$ SEM. \*\*P<0.05 and \*\*\*P<0.01 by two-tailed paired t-test. Ligation +  
920 VU n=12.

921

922

923

924

925

926

927

928



929 **Figure 6**

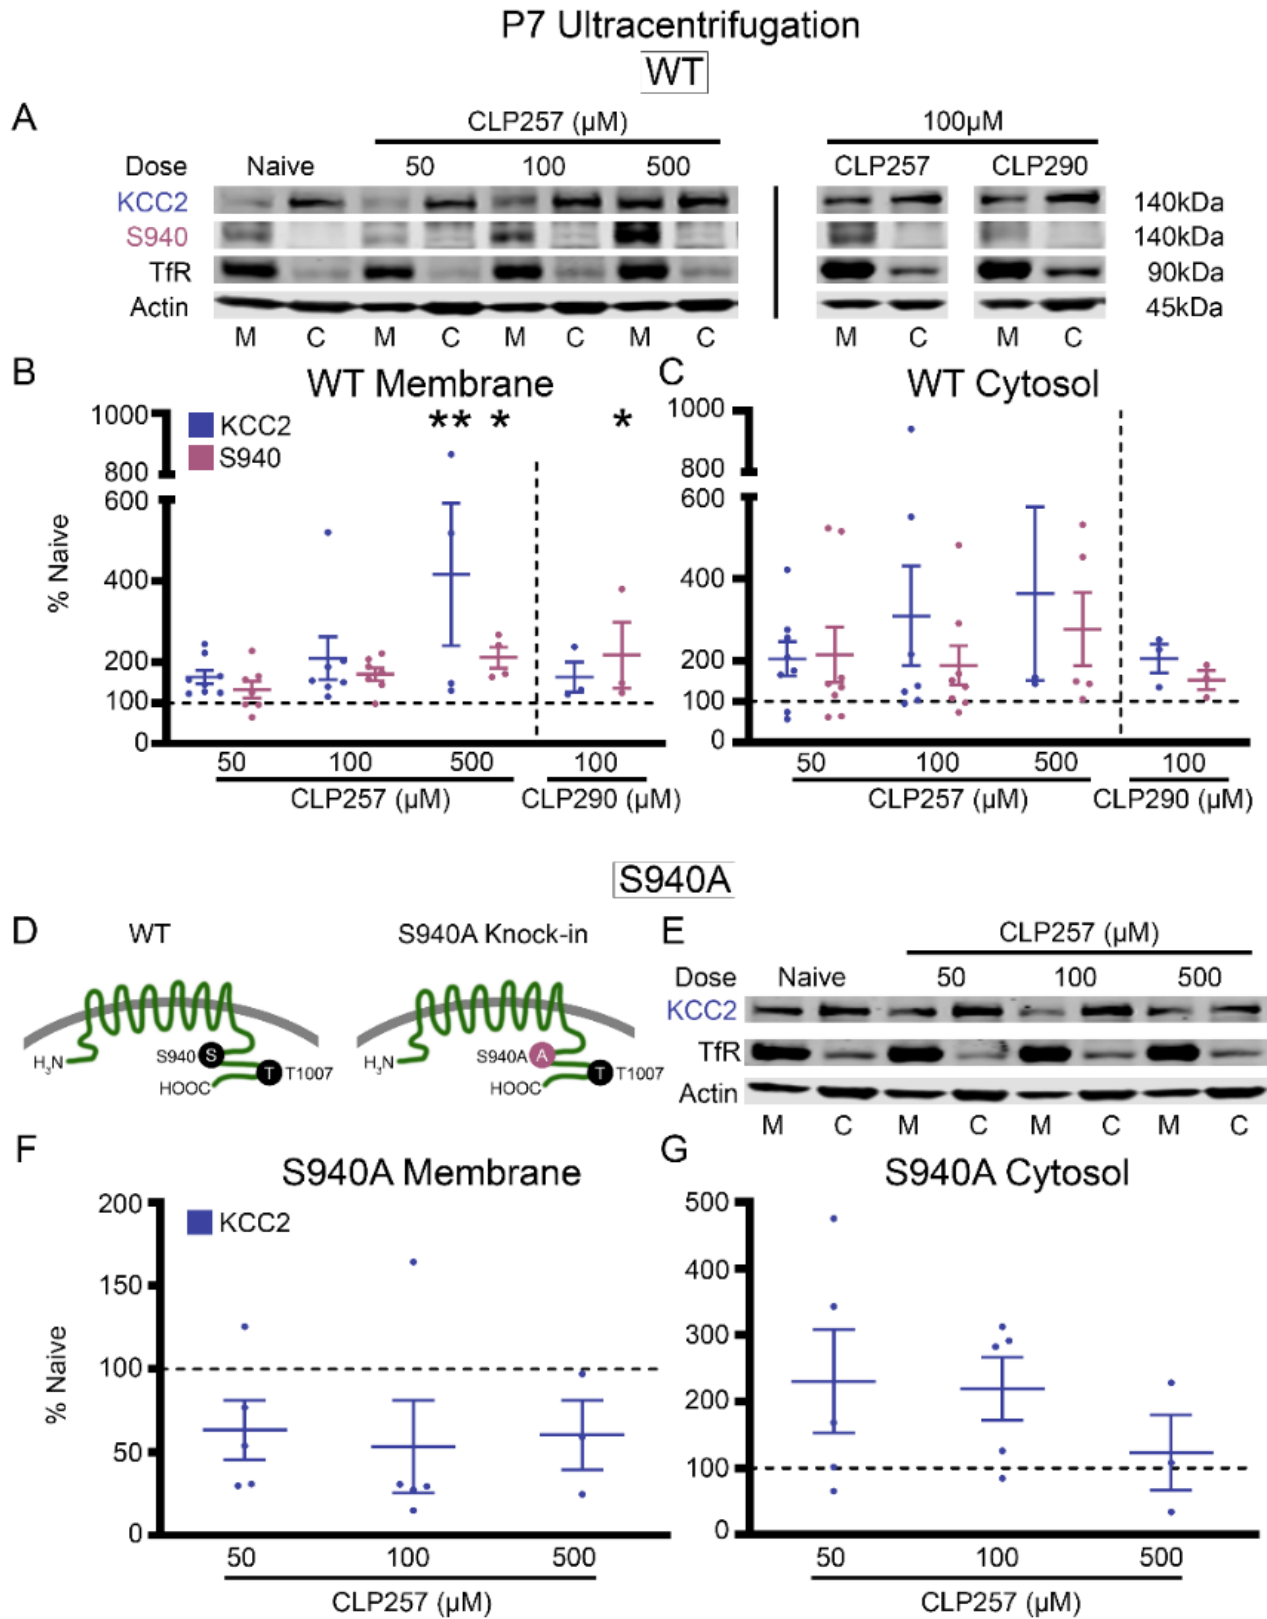

930

931 **Fig. 6. CLP257 upregulated membrane KCC2 expression and S940**  
932 **phosphorylation. (A)** KCC2 and S940 protein expression in the plasma membrane (M)  
933 and cytosol (C) for all treated P7 wildtype (WT) brain slices. **(B)** KCC2 and S940 protein  
934 expression in the membrane and **(C)** cytosol for all treatment groups plotted as percent  
935 of naïve. Number of WT P7 pups: n=8 (50 $\mu$ M CLP257), n=7 (100 $\mu$ M CLP257), n=4  
936 (500 $\mu$ M CLP257), n=3 (100 $\mu$ M CLP290). KCC2 functional enhancement by CLP257 is  
937 dependent upon the phosphorylation of S940. **(D)** Graphical representation of S940A<sup>+/+</sup>  
938 knock-in mutant mice (36). **(E)** KCC2 expression in the plasma membrane and cytosol  
939 for all treated brain slices from S940A<sup>+/+</sup> P7 pups. **(F)** KCC2 expression in the membrane  
940 and **(G)** cytosol for all S940A<sup>+/+</sup> treatment groups plotted as percent of naïve. All proteins  
941 of interest in the cytosol were normalized to housekeeping protein  $\beta$ -actin. All proteins of  
942 interest in the plasma membrane were normalized to transferrin (TfR). Phosphoproteins  
943 were normalized to their respective total protein. Data plots show all data points with  
944 means  $\pm$ SEM. \* P<0.05 and \*\* P<0.01 by 1-way ANOVA. S940A<sup>+/+</sup> P7 pups: n=5 (50 $\mu$ M  
945 CLP257), n=5 (100 $\mu$ M CLP257), n=3 (500 $\mu$ M CLP257).

946

947

948

949

950

951

952

953

954 **Figure 7**

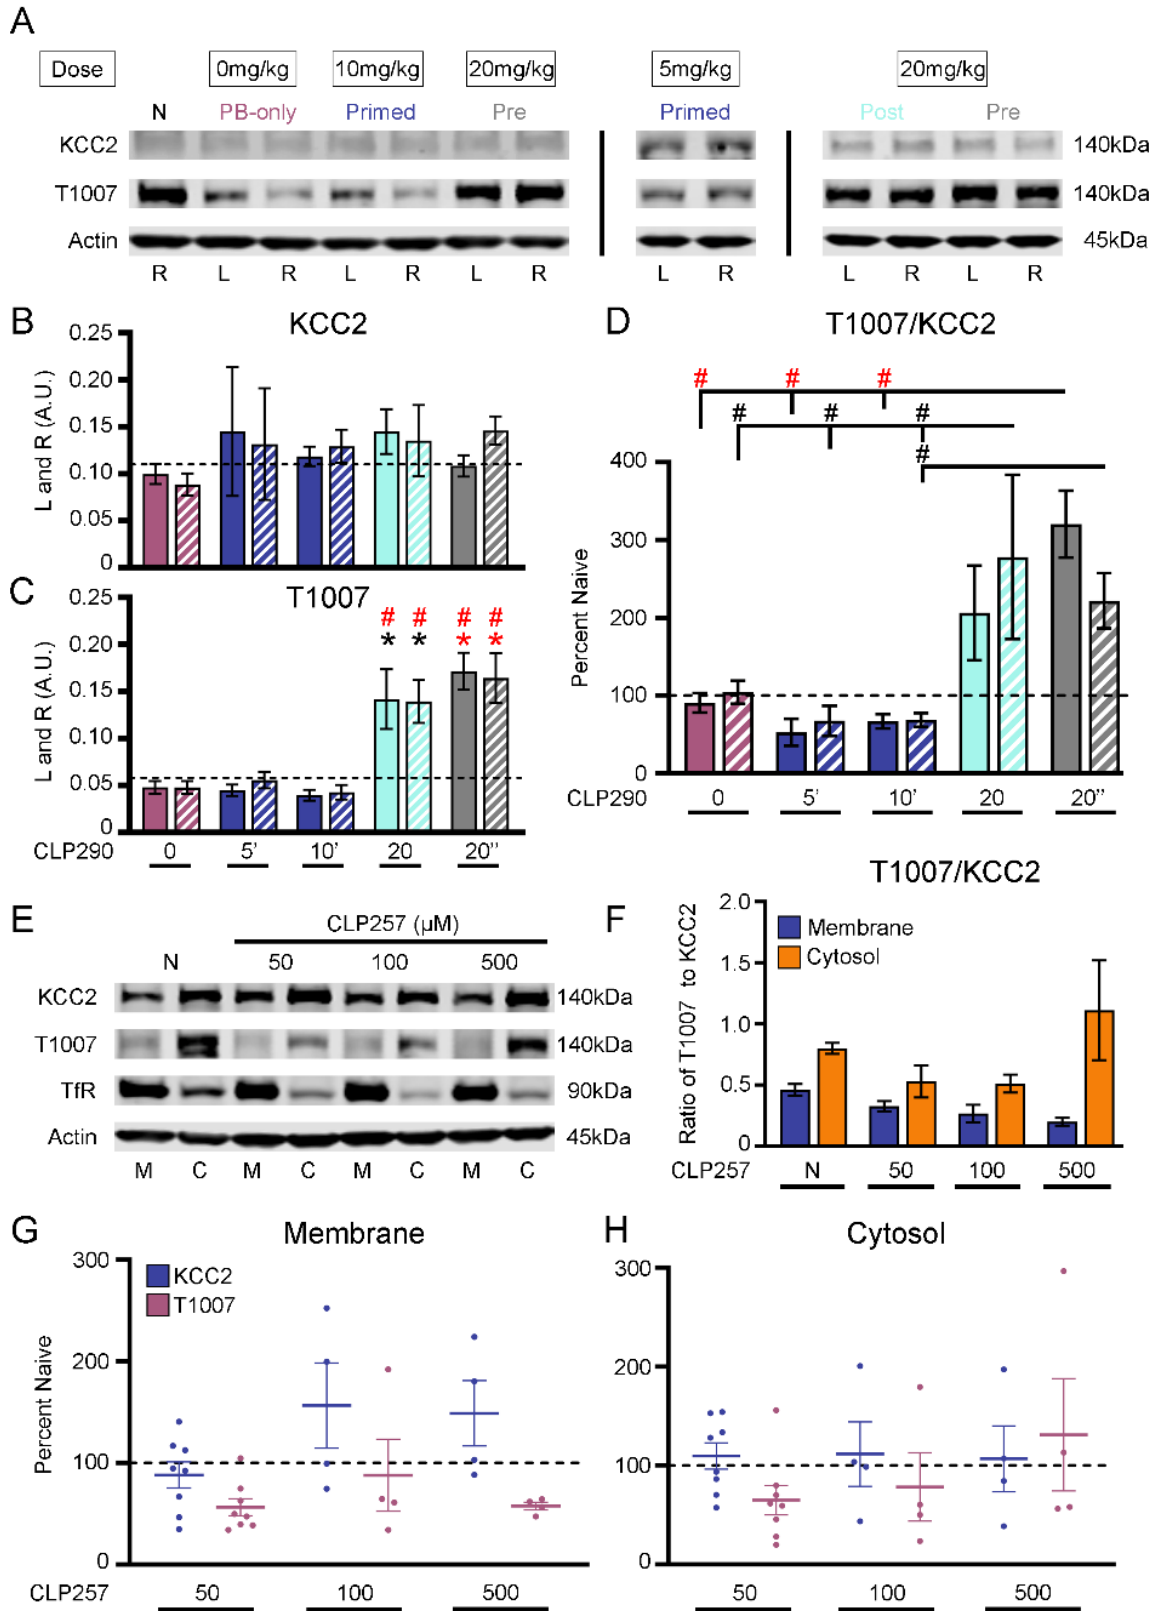

955

956 **Fig. 7. Bolus administration of CLP290 20mg/kg induced homeostatic upregulation**  
957 **of T1007 phosphorylation. (A)** Representative western blot of KCC2 and T1007  
958 expression 24h after ischemic neonatal seizures. **(B)** KCC2 and **(C)** T1007 expression in  
959 left (L) and right (R) hemispheres. **(D)** T1007/KCC2 ratios plotted as percent naïve for L  
960 and R hemispheres. Naïve n=10 PB-only; n=14; CLP290 5' n=3; CLP290 10' n=9;  
961 CLP290 20 n=4; CLP290 20" n=8. **(E)** Representative western blot of KCC2 and T1007  
962 expression at the membrane (M) and cytosol (C) in CLP257 treated slices. **(F)** T1007-  
963 KCC2 ratio for M and C for CLP257 treated slices. **(G)** Membrane KCC2 and T1007  
964 plotted as percent naïve. **(H)** Cytosol KCC2 and T1007 plotted as percent naïve. \*P<0.05  
965 and \*P<0.001 by one-way ANOVA vs Naive. #P<0.05 and #P<0.001 by one-way ANOVA  
966 vs PB-Only. n=8 (50µM CLP257); n=4 (100µM CLP257); n=4 (500µM CLP257).

967

968

969

970

971

972

973

974

975

976

977

978

979 **Figure 8**

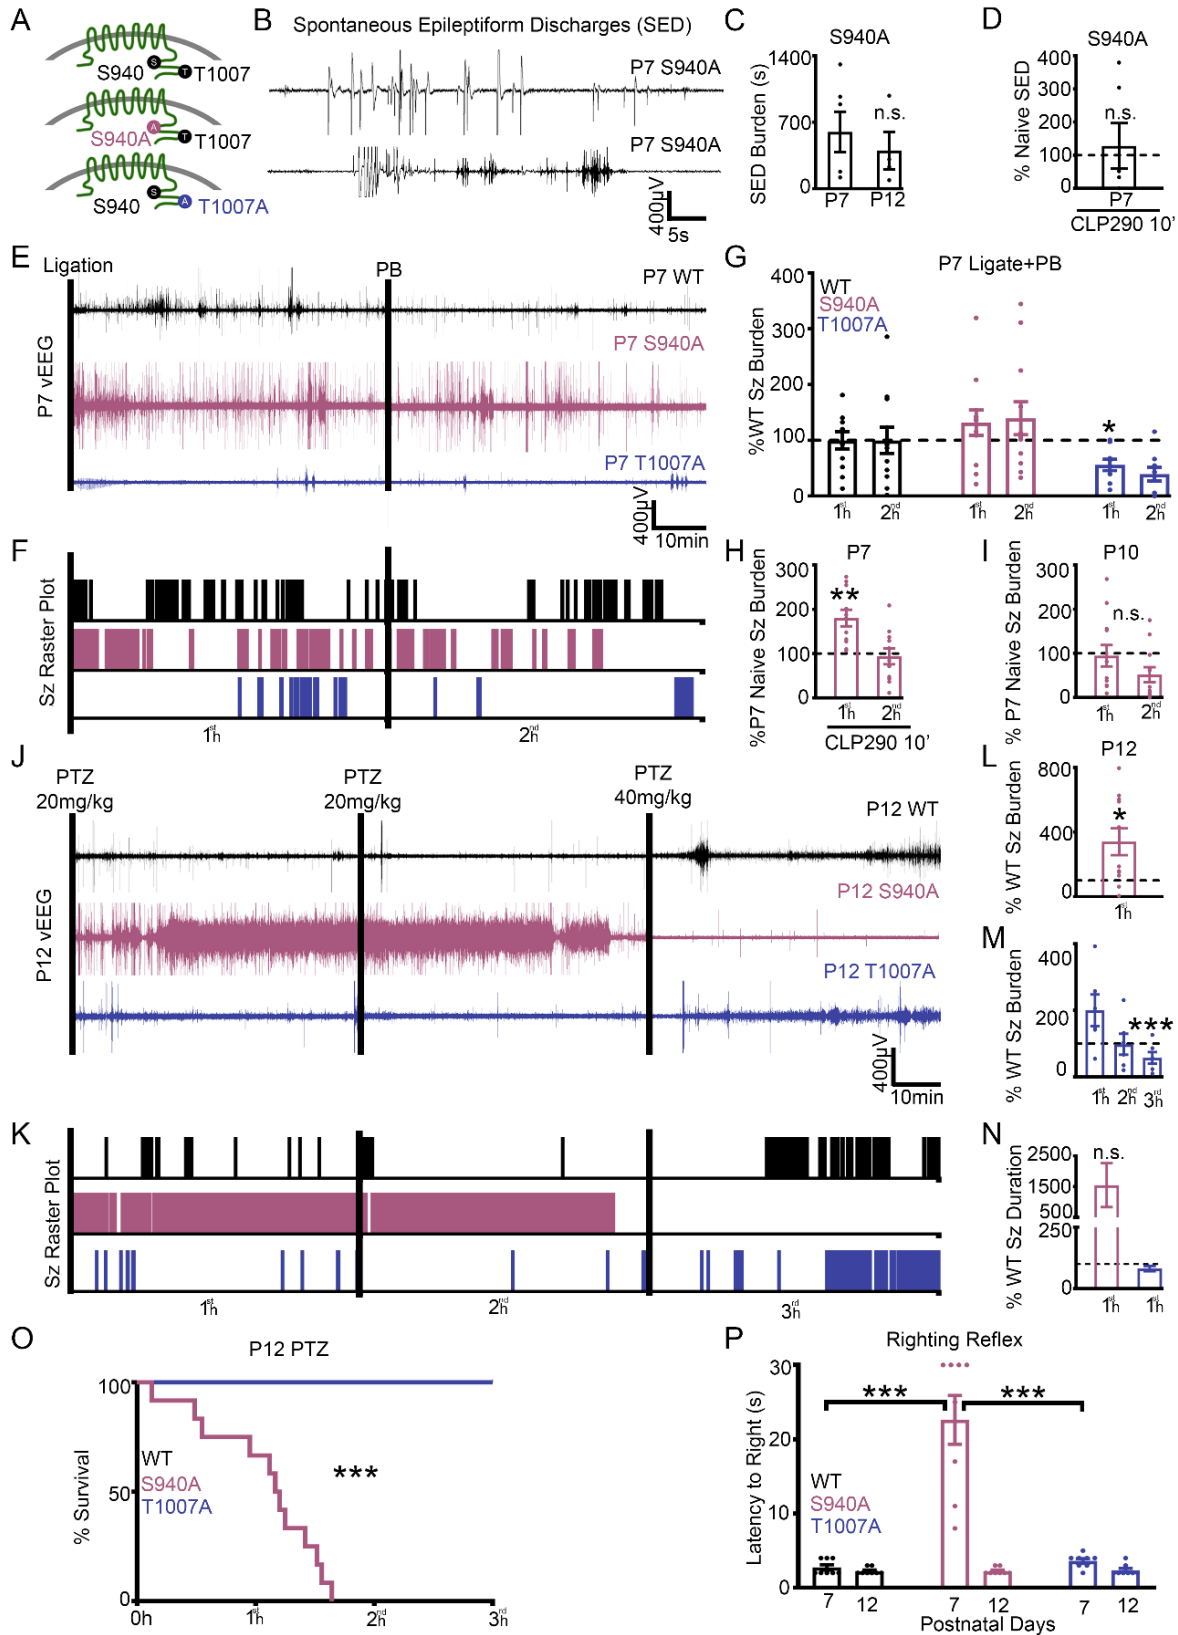

980

981 **Fig.8. Inability to phosphorylate S940 or T1007 in knock-in pups regulated neonatal**  
982 **seizure susceptibility. (A)** Graphical representation of homozygous S940A<sup>+/+</sup> knock-in  
983 mutant mice (25) and homozygous T1007A knock-in mutant mice (24). **(B)** S940A<sup>+/+</sup> mice  
984 had spontaneous epileptiform discharges (SEDs) at P7 and **(C)** P12. **(D)** Spontaneous  
985 epileptiform discharge duration of P7 S940A<sup>+/+</sup> pups administered CLP290 10' treatment.  
986 Naïve P7 S940A<sup>+/+</sup> n=6; Naïve P12 S940A<sup>+/+</sup> n=4; CLP290 10' P7 S940A<sup>+/+</sup> n=6. (E-G)  
987 P7 T1007A<sup>+/+</sup> pups are resistant to ischemic neonatal seizures. **(E)** EEG traces and **(F)**  
988 seizure frequency raster plots for P7 WT, S940A<sup>+/+</sup>, and T1007A<sup>+/+</sup>pups that underwent  
989 unilateral carotid ligation. **(G)** 1<sup>st</sup> vs 2<sup>nd</sup> hour seizure burdens after unilateral carotid  
990 ligation plotted as percent WT. WT n=12; S940A<sup>+/+</sup> n=12; and T1007A<sup>+/+</sup> n=9. **(H)** P7  
991 S940A<sup>+/+</sup> ischemic seizures were CLP290 (10') resistant. Seizure burden of CLP290 10'  
992 treated P7 S940A<sup>+/+</sup> pups after unilateral carotid ligation plotted as P7 percent naïve  
993 S940A<sup>+/+</sup>. CLP290 10' treated P7 S940A<sup>+/+</sup> n=11. **(I)** Seizure burden of P10 S940A<sup>+/+</sup> pups  
994 (n=8) after unilateral carotid ligation, plotted as P7 percent naïve S940A<sup>+/+</sup>. **(J-O)** Naïve  
995 P12 S940A<sup>+/+</sup> mice are susceptible to status epilepticus and mortality. **(J)** Representative  
996 EEG trace and **(K)** seizure frequency raster plot of naïve P12 WT, S940A<sup>+/+</sup>, and  
997 T1007A<sup>+/+</sup> pups. Black bars indicate intraperitoneal pentylenetetrazol (PTZ) injections. **(L)**  
998 Total seizure burden of P12 S940A<sup>+/+</sup> pups after PTZ administration plotted as percent  
999 WT. **(M)** 1<sup>st</sup>, 2<sup>nd</sup>, and 3<sup>rd</sup> hour seizure burdens at P12 in T1007A<sup>+/+</sup> pups plotted as percent  
1000 WT. **(N)** 1<sup>st</sup> hour average seizure durations for S940A<sup>+/+</sup> and T1007A<sup>+/+</sup> P12 pups, plotted  
1001 as percent WT. **(O)** Survival plot for P12 WT, T1007A<sup>+/+</sup>, and S940A<sup>+/+</sup> pups during the  
1002 PTZ challenge. P12 WT n=11; S940A<sup>+/+</sup> n=11; and T1007A<sup>+/+</sup> n=6 pups. **(P)** Duration of  
1003 time to righting reflex at P7 and P12 in naïve WT, T1007A<sup>+/+</sup>, and S940A<sup>+/+</sup> pups. (n=8

1004 each group). \* $P < 0.05$ ; \*\* $P < 0.01$ ; \*\*\* $P < 0.001$  by unpaired t-test vs. WT for all seizure data.

1005 Survival analysis \*\*\* $P < 0.001$  by Mantel-Cox test. Righting Reflex by one-way ANOVA.

1006

1007

1008

1009

1010

1011

1012

1013

1014

1015

1016

1017

1018

1019

1020

1021

1022

1023

1024

1025

1026

## **Supplementary Materials for**

1027

1028 **Targeting ischemia-induced KCC2 hypofunction rescues refractory neonatal**

1029 **seizures and mitigates epileptogenesis in a mouse model**

1030

1031

1032 **Brennan J. Sullivan<sup>1</sup>, Pavel A. Kipnis<sup>1</sup>, Brandon M. Carter<sup>1</sup>, Shilpa D. Kadam<sup>1, 2\*</sup>**

1033

1034

### **Materials and Methods**

1036

#### **Unilateral carotid ligation**

1038 A comprehensive protocol for unilateral carotid ligation and neonatal video-EEG

1039 recordings has been published (71) At P7 or P10, animals were subjected to permanent

1040 unilateral ligation (without transection) of the right common carotid artery using 6-0

1041 surgisilk (Fine Science Tools, BC Canada) under isoflurane anesthesia. The outer skin

1042 was closed with 6-0 monofilament nylon (Covidien, MA), and lidocaine was applied as

1043 local anesthetic. Animals were implanted with 3 subdermal EEG scalp electrodes: 1

1044 recording and 1 reference overlying the bilateral parietal cortices, and 1 ground electrode

1045 overlying the rostrum. Wire electrodes (IVES EEG; Model # SWE-L25 –MA, IVES EEG

1046 solutions, USA) were implanted subdermally and fixed in position with cyanoacrylate

1047 adhesive (KrazyGlue). Pups recovered from anesthesia over a few minutes. Animals

1048 were tethered to a preamplifier within a recording chamber for 2h of continuous vEEG



1049 recording and were maintained at 36°C with heated isothermal pads. At the end of the  
1050 recording session, sub-dermal electrodes were removed, and the pups were returned to  
1051 the dam.

1052

### 1053 **CLP290 plasma and brain availability in neonatal mice**

1054 Standards for HPLC were created using CLP257 (MilliporeSigma, USA) and  
1055 CLP290 (Yves De Koninck Lab). P7 and P10 naïve pups of both sexes were administered  
1056 CLP290 IP as three treatment groups: 10mg/kg, 20mg/kg, or vehicle. After 4h pups were  
1057 anesthetized with chloral hydrate (90 mg/ml; IP), and transcardiac blood samples (100µL)  
1058 were collected. The same pups were transcardially perfused with ice cold PBS, and the  
1059 whole fresh brains harvested. Brain samples were flash frozen in dry ice, homogenized  
1060 using a sonicator, and stored at -80°C. Blood and brain samples from CLP290 treated  
1061 and naïve pups were analyzed for CLP290 and CLP257 concentrations via HPLC using  
1062 a C18 column and 10/90 organic/aqueous mobile phase.

1063

### 1064 **VU 0463271**

1065 To assess the role of KCC2 inhibition in neonatal seizure severity at P7 after  
1066 ligation, the potent and selective KCC2 inhibitor VU 0463271 (VU) was administered at  
1067 1h (0.5mg/kg; IP) in lieu of PB (Figure 1). VU was dissolved in 20/80% dimethyl sulfoxide  
1068 (DMSO)/PBS solution. To assess to role of KCC2 antagonism in neonatal seizure  
1069 occurrence, naïve P7 or P10 pups underwent vEEG with 0.25mg/kg VU administered at  
1070 the start of recording in lieu of ligation and 0.5mg/kg VU administered at 1h in lieu of PB.

1071

1072 **P12 PTZ Challenge**

1073 To investigate the long-term effects of CLP290 treatment, P12 pups underwent a  
1074 three hour vEEG recording during a pentylenetetrazole (PTZ; dissolved in 100% PBS)  
1075 challenge. At P7 pups were either naive, PB-only, or P7 CLP290 10'. These P7 pups then  
1076 underwent a PTZ challenge at P12. All pups were administered PTZ at the beginning of  
1077 the vEEG recording (20mg/kg; IP), at 1h (20mg/kg; IP), and at 2h (40mg/kg; IP).

1078

1079 **Western blot analysis at 24h post-ligation**

1080 All animals for immunochemical characterizations were anesthetized with chloral  
1081 hydrate (90 mg/ml; IP) before being transcidentally perfused with ice cold saline. The whole  
1082 fresh brains were removed, the cerebellum was discarded, and the left and right  
1083 hemispheres were separated. Brains were stored at -80°C in preparation for further  
1084 processing. Brain tissue homogenates were made and suspended in TPER cell lysis  
1085 buffer containing 10% protease/phosphatase inhibitor cocktail. Total protein amounts  
1086 were measured using the Bradford protein assay (Bio-Rad, Hercules, CA, USA) at 570nm  
1087 and the samples diluted for 50µg of protein in each sample. 20µL of protein samples were  
1088 run on 4-20% gradient tris-glycine gels (Invitrogen, Gand Island, NY, USA) for 120min at  
1089 130V and were transferred onto nitrocellulose membranes overnight at 20V. After the  
1090 transfer, the nitrocellulose membranes underwent a 1h blocking step in Rockland buffer  
1091 before 6h incubation with primary antibodies (for all antibody RRIDS, see Key Resources  
1092 Table): mouse α-KCC2 (1:1000, Millipore), rabbit α-phospho-KCC2-S940 (1:1000 Aviva  
1093 Systems Biology), rabbit α-phospho-KCC2-T1007 (1:1000; Phospho solutions) mouse α-  
1094 TrkB (1:1000, BD Biosciences), rabbit α-phospho-TrkB-Y816 (1:500, Millipore), and

1095 mouse  $\alpha$ -actin (1:10000, LI-COR Biosciences). Membranes were then incubated with  
1096 fluorescent secondary antibodies (1:5000, goat  $\alpha$ -rabbit and goat  $\alpha$ -mouse, Li-Cor  
1097 Biosciences, USA). Chemiluminescent protein bands were analyzed using the Odyssey  
1098 infrared imaging system 2.1 (LI-COR Biosciences). The optical density of each protein  
1099 sample was normalized to their corresponding actin bands run on each lane for internal  
1100 control. Mean normalized protein expression levels were then calculated for respective  
1101 left and right hemispheres. The expression levels of the proteins of interest in ipsilateral  
1102 hemispheres were normalized to the same in contralateral hemispheres for each pup to  
1103 examine hemispheric percent change of protein expression.

1104

#### 1105 **Surface protein-seperation**

1106 1mm coronal brain slices were obtained from P7 CD-1 mice and recovered for  
1107 45min at 34°C with oxygenation (95%/5% O<sub>2</sub>/CO<sub>2</sub>). After recovery, slices were incubated  
1108 with CLP290 or CLP257 at 34°C with oxygenation for 40min. Slices were placed in TPER  
1109 cell lysing buffer with HALT protease and phosphatase inhibitors and homogenized via  
1110 sonication. After 30min incubation on ice, protein lysates were ultracentrifuged at  
1111 210,000xg (TLA-120.2 rotor, Beckman Coulter Life Sciences), and supernatants were  
1112 collected as the cytosolic components. Pellets were resuspended in TPER/HALT buffer  
1113 and ultracentrifuged; supernatant was discarded as wash fraction. Pellets were  
1114 resuspended in TPER/HALT buffer and collected as the membrane components.  
1115 Membrane and cytosolic components underwent Bradford analysis and Western blotting  
1116 for protein quantification. Plasma membrane proteins were normalized to TfR. Cytosolic  
1117 proteins were normalized to  $\beta$ -actin.

1118 **Supplemental Figure 1**

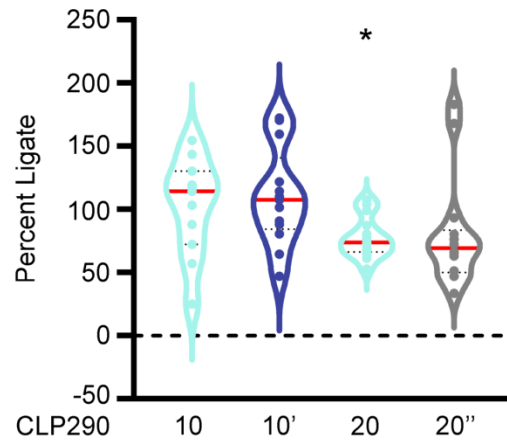

1119

1120

1121

1122

1123

1124

1125

1126

1127

1128

1129

1130

1131

1132

1133

1134

1135 **Supplemental Fig. 1. CLP290 20 Post reduced first hour seizure burden.** 1<sup>st</sup> hour  
1136 seizure burdens for 10,10',20, and 20" doses of CLP290. Violin plots show all data points  
1137 as percent PB-only 1<sup>st</sup> hour seizure burden. P=0.0477, two-tailed *t*-test vs. PB-only 1<sup>st</sup>  
1138 hour seizure burden.

1139

1140

1141

1142

1143

1144

1145

1146

1147

1148

1149

1150

1151

1152

1153

1154

1155

1156

1157

1158 Supplemental Figure 2

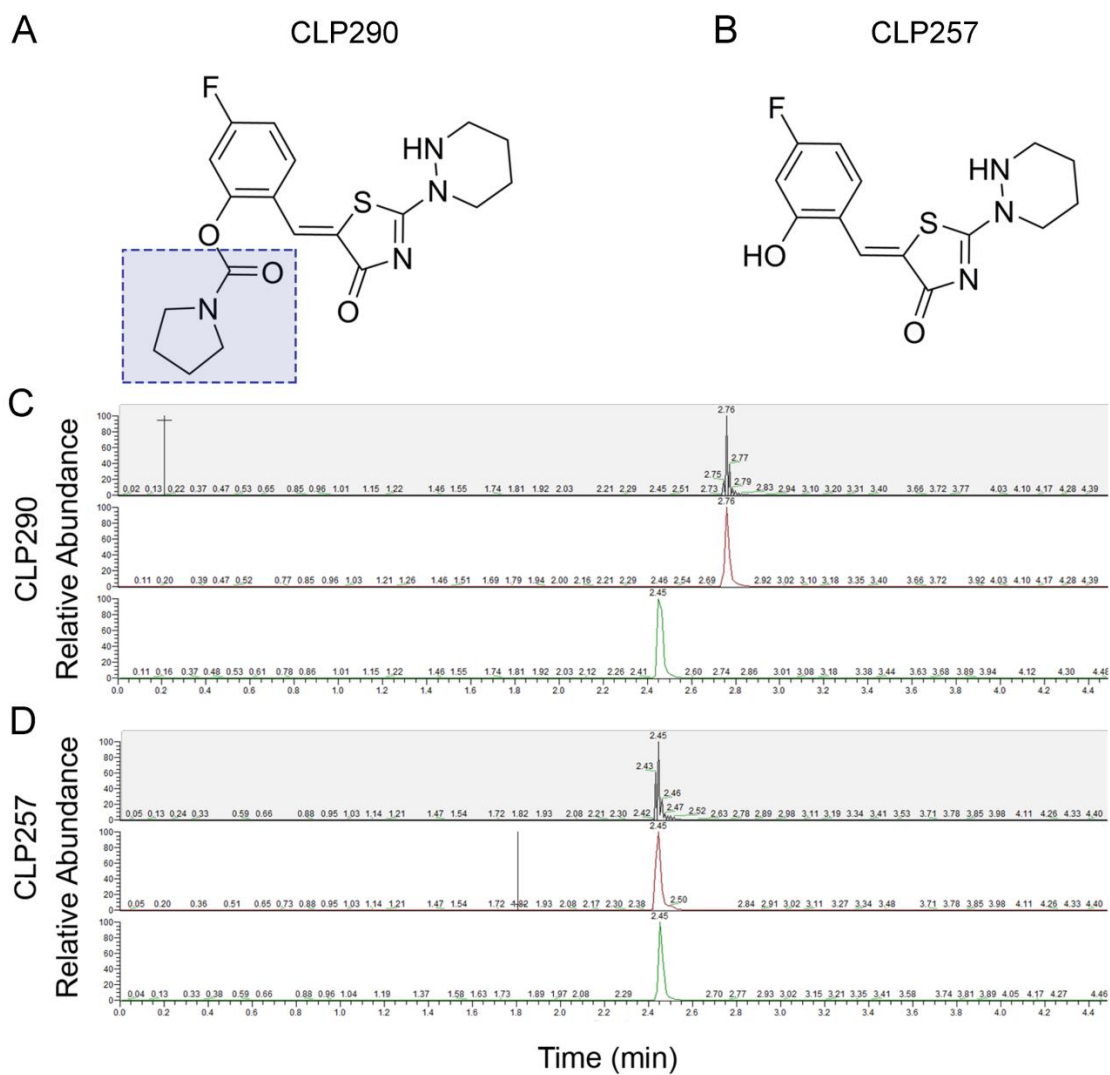

1159

1160

1161

1162

1163

1164

1165

1166 **Supplemental Fig. 2. Characteristic peaks of CLP290 and CLP257 on HPLC. (A)**

1167 CLP290 is the carbamate prodrug of **(B)** CLP257. **(C)** The characteristic peaks of CLP290

1168 (Pharmablock) and **(D)** CLP257 (Sigma) on HPLC.

1169

1170

1171

1172

1173

1174

1175

1176

1177

1178

1179

1180

1181

1182

1183

1184

1185

1186

1187

1188

1189 **Supplemental Figure 3**

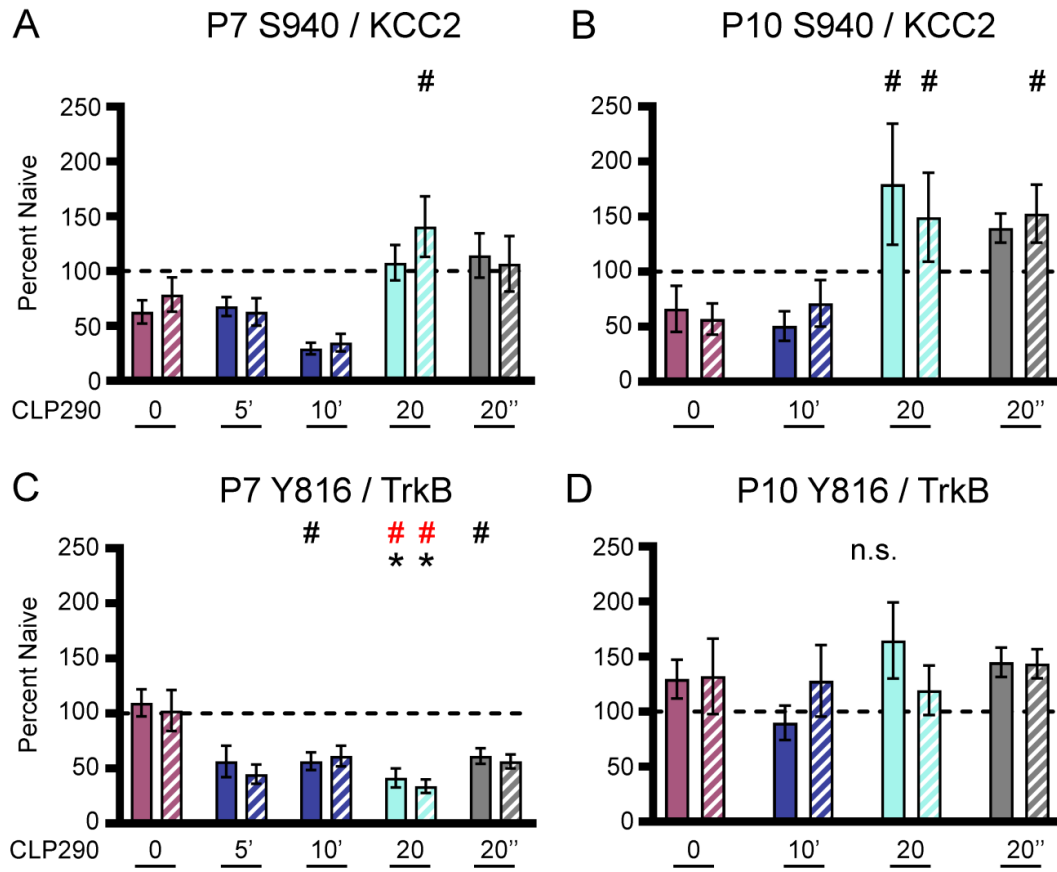

1190

1191

1192

1193

1194

1195

1196

1197

1198

1199

1200



1201 **Supplemental Fig. 3. CLP290 reduced Y816 activation. (A)** S940/KCC2 ratios 24h  
1202 after P7 ischemic neonatal seizures plotted as left and right hemispheres. **(B)**  
1203 S940/KCC2 ratios 24h after P10 ischemic neonatal seizures plotted as left and right  
1204 hemispheres. **(C)** Y816/TrkB ratios 24h after P7 ischemic neonatal seizures plotted as  
1205 left and right hemispheres. **(D)** Y816/TrkB ratios 24h after P10 ischemic neonatal seizures  
1206 plotted as left and right hemispheres. \*P<0.05 and \*P<0.001 by 1-way ANOVA vs. Naïve.  
1207 #P<0.05 and #P<0.001 vs. PB-only P7 pups: Naïve n=27; PB-only n=18; 5 Post n=3; 10  
1208 Post n=9; 20 Post n=13; 5 Primed n=4; 10 Primed n=11; 20 Pre n=9. P10 pups: Naïve  
1209 n=18, PB-only n=11, 10 Post n=6, 20 Post n=6, 10 Primed n=5, 20 Pre n=7.

1210

1211

1212

1213

1214

1215

1216

1217

1218

1219

1220

1221

1222

1223

1224 **Supplemental Figure 4**

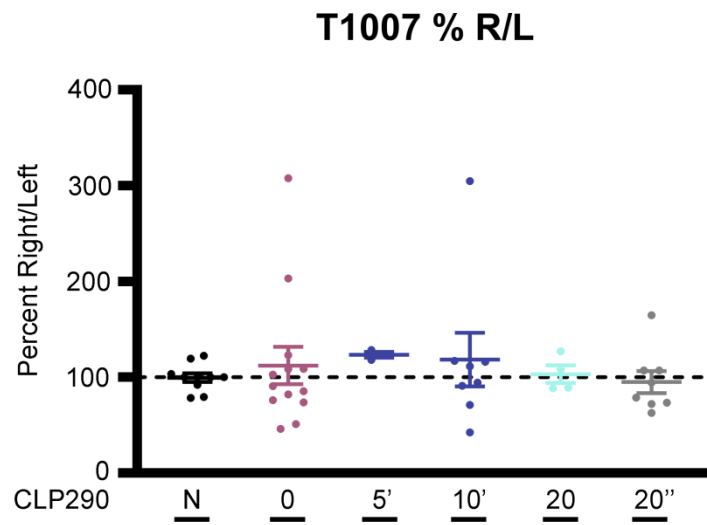

1225

1226

1227

1228

1229

1230

1231

1232

1233

1234

1235

1236

1237

1238

1239 **Supplemental Fig. 4. T1007 is not activated by ischemia.** T1007 expression as  
1240 percent ipsilateral/contralateral plotted as percent naïve.

1241

1242

1243

1244

1245

1246

1247

1248

1249

1250

1251

1252

| Reagent type (species) or resource | Designation                                                | Source Reference                | Identifiers           | Additional Information                                |
|------------------------------------|------------------------------------------------------------|---------------------------------|-----------------------|-------------------------------------------------------|
| Genetic reagent (M. musculus)      | CD-1                                                       | Charles River                   | 022                   | N/A                                                   |
| Genetic reagent (M. musculus)      | S940A                                                      | Silayeva et al. 2015            | N/A                   | Dr. Stephen Moss, Tufts University School of Medicine |
| Genetic reagent (M. musculus)      | T1007A                                                     | Moore et al. 2018               | N/A                   | Dr. Stephen Moss, Tufts University School of Medicine |
| Chemical compound, drug            | Phenobarbital (PB)                                         | MilliporeSigma                  | P5178                 | N/A                                                   |
| Chemical compound, drug            | CLP290                                                     | Gagnon et al. 2013              | N/A                   | Dr. Yves De Koninck, Université Laval                 |
| Chemical compound, drug            | CLP290                                                     | PharmaBlock                     | PBSQ8214              | N/A                                                   |
| Chemical compound, drug            | CLP257                                                     | MilliporeSigma                  | SML1368               | N/A                                                   |
| Chemical compound, drug            | Pentylentetrazol (PTZ)                                     | MilliporeSigma                  | P6500                 | N/A                                                   |
| Chemical compound, drug            | VU0463271 (VU)                                             | Tocris                          | 4719                  | N/A                                                   |
| Chemical compound, drug            | DMSO                                                       | Sigma                           | D8418                 | N/A                                                   |
| Chemical compound, drug            | HPCD                                                       | Sigma                           | H107                  | N/A                                                   |
| Software, algorithm                | Graphpad Prism                                             | Graphphad Software              | RRID:SCR_002798       | 8                                                     |
| Software, algorithm                | Sirenia                                                    | Pinnacle Technology             | pinnaclet.com/sirenia | 3-Channel EEG/EMG Tethered Mouse System               |
| Antibody                           | mouse $\alpha$ KCC2                                        | Aviva Systems Biology OASE00240 | AB_2721238            | 1:1000; WB                                            |
| Antibody                           | rabbit $\alpha$ pKCC2-S940                                 | Aviva Systems Biology OAPC00188 | AB_2721198            | 1:1000; WB                                            |
| Antibody                           | rabbit $\alpha$ pKCC2-1007                                 | PhosphoSolutions p1551-1007     | AB_2716769            | 1:1000; WB                                            |
| Antibody                           | mouse $\alpha$ TrkB                                        | BD Biosciences 610102           | AB_397508             | 1:1000; WB                                            |
| Antibody                           | rabbit $\alpha$ pTrkB-Y816                                 | Millipore ABN1381               | AB_2721199            | 1:500; WB                                             |
| Antibody                           | mouse $\alpha$ actin                                       | LI-COR Biosciences 926-42213    | AB_2637092            | 1:10000; WB                                           |
| Antibody                           | mouse $\alpha$ Transferrin Receptor                        | ThermoFisher Scientific         | AB_2533029            | 1:500; WB                                             |
| Antibody                           | goat $\alpha$ mouse IgG, IRDye® 800CW Conjugated           | LI-COR Biosciences 926-32210    | AB_621842             | 1:5000; WB                                            |
| Antibody                           | goat $\alpha$ rabbit IgG Antibody, IRDye® 680LT Conjugated | LI-COR Biosciences 926-68021    | AB_10706309           | 1:5000; WB                                            |

1253

1254
